# Supplementary material for: Primary care treatment of insomnia: study protocol for a pragmatic, multicentre, randomised controlled trial comparing nurse-delivered sleep restriction therapy to sleep hygiene (the HABIT trial)
Source: PubMed Central journal article supplement — BMJ Open. 2020 Mar 4;10(3):e036248. doi: 10.1136/bmjopen-2019-036248 (PMC7059413; doi:10.1136/bmjopen-2019-036248), 2020-03-04
Supplement: bmjopen-2019-036248.draft_revisions.pdf [file bmjopen-2019-036248.draft_revisions.pdf]

# BMJ Open

BMJ Open is committed to open peer review. As part of this commitment we make the peer review history of every article we publish publicly available.

When an article is published we post the peer reviewers' comments and the authors' responses online. We also post the versions of the paper that were used during peer review. These are the versions that the peer review comments apply to.

The versions of the paper that follow are the versions that were submitted during the peer review process. They are not the versions of record or the final published versions. They should not be cited or distributed as the published version of this manuscript.

BMJ Open is an open access journal and the full, final, typeset and author-corrected version of record of the manuscript is available on our site with no access controls, subscription charges or pay-per-view fees (<http://bmjopen.bmj.com>).

If you have any questions on BMJ Open's open peer review process please email [info.bmjopen@bmj.com](mailto:info.bmjopen@bmj.com)

# BMJ Open

## Primary care treatment of insomnia: study protocol for a pragmatic, multicentre, randomised controlled trial comparing nurse-delivered sleep restriction therapy to sleep hygiene (the HABIT trial)

|                               |                                                                                                                                                                                                                                                                                                                                                                                                                                                                                                                                                                                                                                                                                                                                                                                                                   |
|-------------------------------|-------------------------------------------------------------------------------------------------------------------------------------------------------------------------------------------------------------------------------------------------------------------------------------------------------------------------------------------------------------------------------------------------------------------------------------------------------------------------------------------------------------------------------------------------------------------------------------------------------------------------------------------------------------------------------------------------------------------------------------------------------------------------------------------------------------------|
| Journal:                      | <i>BMJ Open</i>                                                                                                                                                                                                                                                                                                                                                                                                                                                                                                                                                                                                                                                                                                                                                                                                   |
| Manuscript ID                 | bmjopen-2019-036248                                                                                                                                                                                                                                                                                                                                                                                                                                                                                                                                                                                                                                                                                                                                                                                               |
| Article Type:                 | Protocol                                                                                                                                                                                                                                                                                                                                                                                                                                                                                                                                                                                                                                                                                                                                                                                                          |
| Date Submitted by the Author: | 09-Dec-2019                                                                                                                                                                                                                                                                                                                                                                                                                                                                                                                                                                                                                                                                                                                                                                                                       |
| Complete List of Authors:     | Kyle, Simon; University of Oxford, Sleep and Circadian Neuroscience Institute<br>Madigan, Claire; University of Oxford, Nuffield Department of Primary Care Health Sciences<br>Begum, Nargis; Nuffield Department of Primary Care Health Sciences<br>Abel, Lucy; University of Oxford<br>Armstrong, S; Community and Health Research Unit, College of Social Science, University of Lincoln, Lincoln, UK, School of Health and Social Care<br>Aveyard, Paul; University of Oxford, Primary Care Health Sciences<br>Bower, Peter; University of Manchester, NPCRDC<br>Ogburn, Emma; University of Oxford,<br>Siriwardena, Aloysius; University of Lincoln, School of Health and Social Care<br>Yu, Ly-Mee; University of Oxford, Department of Primary Care Health Sciences<br>Espie, Colin; University of Oxford, |
| Keywords:                     | SLEEP MEDICINE, Adult psychiatry < PSYCHIATRY, PRIMARY CARE                                                                                                                                                                                                                                                                                                                                                                                                                                                                                                                                                                                                                                                                                                                                                       |
|                               |                                                                                                                                                                                                                                                                                                                                                                                                                                                                                                                                                                                                                                                                                                                                                                                                                   |

SCHOLARONE™  
Manuscripts

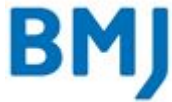

I, the Submitting Author has the right to grant and does grant on behalf of all authors of the Work (as defined in the below author licence), an exclusive licence and/or a non-exclusive licence for contributions from authors who are: i) UK Crown employees; ii) where BMJ has agreed a CC-BY licence shall apply, and/or iii) in accordance with the terms applicable for US Federal Government officers or employees acting as part of their official duties; on a worldwide, perpetual, irrevocable, royalty-free basis to BMJ Publishing Group Ltd ("BMJ") its licensees and where the relevant Journal is co-owned by BMJ to the co-owners of the Journal, to publish the Work in this journal and any other BMJ products and to exploit all rights, as set out in our [licence](#).

The Submitting Author accepts and understands that any supply made under these terms is made by BMJ to the Submitting Author unless you are acting as an employee on behalf of your employer or a postgraduate student of an affiliated institution which is paying any applicable article publishing charge ("APC") for Open Access articles. Where the Submitting Author wishes to make the Work available on an Open Access basis (and intends to pay the relevant APC), the terms of reuse of such Open Access shall be governed by a Creative Commons licence – details of these licences and which [Creative Commons](#) licence will apply to this Work are set out in our licence referred to above.

Other than as permitted in any relevant BMJ Author's Self Archiving Policies, I confirm this Work has not been accepted for publication elsewhere, is not being considered for publication elsewhere and does not duplicate material already published. I confirm all authors consent to publication of this Work and authorise the granting of this licence.

1  
2  
3 **Primary care treatment of insomnia: study protocol for a pragmatic,**  
4 **multicentre, randomised controlled trial comparing nurse-delivered sleep**  
5 **restriction therapy to sleep hygiene (the HABIT trial)**  
6  
7  
8  
9

10  
11  
12  
13  
14  
15 Simon D. Kyle<sup>1</sup>, Claire D. Madigan<sup>2</sup>, Nargis Begum<sup>2</sup>, Lucy Abel<sup>2</sup>, Stephanie Armstrong<sup>3</sup>,  
16 Paul Aveyard<sup>2</sup>, Peter Bower<sup>4</sup>, Emma Ogburn<sup>2</sup>, Aloysius Siriwardena<sup>3</sup>, Ly-Mee Yu<sup>2</sup>, Colin A.  
17  
18  
19  
20  
21  
22  
23  
24  
25  
26  
27  
28  
29  
30  
31  
32  
33  
34  
35  
36  
37  
38  
39  
40  
41  
42  
43  
44  
45  
46  
47  
48  
49  
50  
51  
52  
53  
54  
55  
56  
57  
58  
59  
60

Espie<sup>1</sup>

<sup>1</sup>Sleep and Circadian Neuroscience Institute, Nuffield Department of Clinical Neurosciences,  
Sir William Dunn School of Pathology, University of Oxford, South Parks Road, Oxford,  
OX1 3RE.

<sup>2</sup>Nuffield Department of Primary Care Health Sciences, University of Oxford, Radcliffe  
Observatory Quarter, Oxford, OX2 6GG.

<sup>3</sup>School of Health and Social Care, University of Lincoln, Lincoln, LN5 7AT.

<sup>4</sup>NIHR School for Primary Care Research, Centre for Primary Care and Health Services  
Research, Manchester Academic Health Science Centre, University of Manchester,  
Williamson Building, Manchester, M13 9PL.

*Correspondence to:*

Simon D. Kyle, PhD

Sleep and Circadian Neuroscience Institute,  
Nuffield Department of Clinical Neurosciences, University of Oxford  
Dunn School of Pathology, South Parks Road,  
Oxford, OX1 3RE  
[simon.kyle@ndcn.ox.ac.uk](mailto:simon.kyle@ndcn.ox.ac.uk)

## Abstract

**Introduction:** Insomnia is a prevalent sleep disorder that negatively affects quality of life. Multicomponent cognitive-behavioural therapy (CBT) is the recommended treatment but access remains limited, particularly in primary care. Sleep restriction therapy (SRT) is one of the principal active components of CBT and could be delivered by generalist staff in primary care. The aim of this randomised controlled trial is to establish whether nurse-delivered SRT for insomnia disorder in primary care is clinically and cost-effective compared to sleep hygiene advice.

**Methods and Analysis:** In the HABIT trial, 588 participants meeting criteria for insomnia disorder will be recruited from primary care in England and randomised (1:1) to either nurse-delivered SRT (plus sleep hygiene booklet) or sleep hygiene booklet on its own. SRT will be delivered over four weekly sessions; total therapy time is approximately 1 hour. Outcomes will be collected at baseline, 3, 6 and 12 months post-randomisation. The primary outcome is self-reported insomnia severity using the insomnia severity index (ISI) at six months. Secondary outcomes include health-related and sleep-related quality of life, depressive symptoms, use of prescribed sleep medication, diary and actigraphy-recorded sleep parameters, and work productivity. Analyses will be intention to treat. Moderation and mediation analyses will be conducted and a cost-utility analysis and process evaluation will be performed.

**Ethics and dissemination:** Ethical approval was granted by the Yorkshire & the Humber - Bradford Leeds Research Ethics Committee (reference: 18/YH/0153). We will publish our primary findings (on clinical and cost-effectiveness) in high-impact, peer-reviewed journals. There will be further outputs in relation to process evaluation and secondary analyses focused on moderation and mediation. Trial results could make the case for the introduction of nurse-

1  
2  
3 delivered sleep therapy in primary care, increasing access to evidence-based treatment for  
4  
5 people with insomnia disorder.  
6  
7

8  
9 **Trial registration:** ISRCTN42499563  
10

11 **Key words:** Insomnia disorder; sleep restriction therapy; primary care.  
12  
13

#### 14 **Strengths and Limitations of this study** 15

- 16  
17  
18 • This multi-centre RCT will recruit 588 participants and will be the largest trial of  
19  
20 sleep restriction therapy for insomnia.  
21
- 22  
23 • If found to be effective, brief nurse-delivered sleep restriction therapy is scalable and  
24  
25 has the potential to be deployed in primary care.  
26
- 27  
28 • Owing to the nature of the intervention participants will not be blind to treatment  
29  
30 allocation.  
31  
32  
33  
34  
35  
36  
37  
38  
39  
40  
41  
42  
43  
44  
45  
46  
47  
48  
49  
50  
51  
52  
53  
54  
55  
56  
57  
58  
59  
60

## Introduction

Insomnia disorder is characterised by persistent problems with sleep initiation and maintenance, significantly impairing quality of life (1-3). Persistent insomnia affects approximately 10% of the adult population (4) and is a risk factor for several mental and physical health problems, particularly depression and cardiometabolic disease (5,6). Insomnia is also an expensive condition, associated with substantial direct and indirect costs; chiefly reflecting increased healthcare utilisation, work-related absenteeism, reduced work productivity and elevated accident risk (7-9).

Insomnia is treatable. The principal treatment options are hypnotic medication and cognitive behavioural therapy (CBT). The former is indicated for short-term use only, while the latter is the recommended first-line treatment and has been shown to engender sustained improvement in self-reported sleep and insomnia severity (10). Despite national and international clinical guidelines recommending CBT (11-13), access is almost non-existent in routine care across many health systems. In the absence of available treatment, general practitioners (GPs) are limited to administering sleep hygiene guidelines, hypnotics, and (off-label) sedative antidepressants (14-15); yet none are evidence-based for persistent insomnia (12;16), and hypnotics have well-defined side-effects (4). Barriers to wide-scale adoption of CBT for insomnia in routine healthcare relate to limited training, expertise and funding. A major development in the insomnia field, therefore, has been the dismantling of multicomponent, multisession CBT into brief and focussed treatment packages (17), and the training of non-specialists to deliver such therapies (18-20).

SRT has emerged as one of the primary active ingredients within multi-component CBT. The therapy involves restricting and standardising a patient's time in bed with the aim of

1  
2  
3 increasing homoeostatic sleep pressure, over-riding cognitive and physiological arousal, and  
4 strengthening circadian regulation of sleep (21). Tailored prescription of bed and rise-times  
5  
6 over several weeks leads to improved sleep consolidation and reduction in insomnia severity.  
7  
8  
9  
10 Its short length and simplicity renders SRT ideally suited for delivery by generalist staff in  
11  
12 primary care.  
13

14  
15 A systematic review of trials comparing single-component SRT to waitlist control or sleep  
16  
17 hygiene advice found medium-to-large effects on sleep continuity measures (22). Moreover,  
18  
19 recent trials suggest SRT may be as effective as multicomponent CBT (23-24). One primary  
20  
21 care trial compared brief SRT delivered by one GP with sleep hygiene advice (25). The  
22  
23 participants were highly selected so that they were free from comorbidity or medication use.  
24  
25 SRT significantly reduced insomnia severity at 6 months (Cohen's  $d=0.54$ ). While this was  
26  
27 an important first study, a pragmatic trial in primary care testing a scalable model of  
28  
29 treatment delivery is clearly required.  
30  
31  
32

33  
34 We have developed a brief SRT protocol based upon 1) our extensive research using  
35  
36 multicomponent CBT (18-20) and 2) systematic examination of the patient experience of  
37  
38 SRT (26). We aim to test whether brief SRT (alongside sleep hygiene advice) is both  
39  
40 clinically and cost-effective, relative to sleep hygiene advice on its own. We have chosen  
41  
42 practice nurses instead of GPs based on previous successful trial experience with this  
43  
44 professional group (18-20) and with cost-effectiveness and scalability in mind. Practice  
45  
46 nurses are increasingly involved in chronic disease management (where sleep disturbance is a  
47  
48 common comorbidity) and the delivery of brief behavioural interventions in primary care  
49  
50 (27). While previous studies in UK primary care show multicomponent CBT to be effective  
51  
52 when delivered by nurses (18,19), counsellors (28), or through self-help CBT booklets (29),  
53  
54 there has been no large-scale evaluation of the clinical and cost-effectiveness of a brief and  
55  
56 scalable behavioural intervention.  
57  
58  
59  
60



### *Study Objectives*

The primary objective of the Health-professional Administered Brief Insomnia Therapy (HABIT) trial is to establish whether nurse-delivered SRT(+sleep hygiene [SH]) for insomnia disorder in primary care improves insomnia more than SH alone. We hypothesise that participants allocated to SRT(+SH) will demonstrate lower insomnia severity at 6 months post-randomisation compared with those allocated to SH alone.

Our secondary hypotheses are as follow:

1. Compared to SH, participants allocated to SRT(+SH) will report improvements in health-related quality of life, sleep-related quality of life, depressive symptoms, work productivity, pre-sleep arousal and sleep effort (at 3, 6 and 12 months).
2. Compared to SH, participants allocated to SRT(+SH) will demonstrate improvements in sleep parameters (diary and actigraphy-recorded) and report a reduction in use of sleep-promoting medication (6 and 12 months)
3. The effect of SRT(+SH) on insomnia severity will be mediated via reduction in sleep effort and pre-sleep arousal, consistent with theoretical models (21)

Other objectives:

4. To establish whether nurse-delivered SRT(+SH) for insomnia disorder in primary care is cost-effective compared to SH, from NHS and societal perspectives.
5. To undertake a process evaluation to understand intervention delivery, fidelity and acceptability.
6. To test whether insomnia phenotype moderates clinical benefit obtained from SRT(+SH). One prominent model posits that participants with short sleep duration are less likely to experience improvement in insomnia relative to those with normal sleep

1  
2  
3 duration (5). We will examine whether actigraphy-defined sleep duration (< 6hrs vs. ≥  
4  
5 6hrs) at baseline moderates the effect of SRT on clinical outcomes (at 6 months)  
6

- 7  
8 7. To test whether SRT adherence mediates degree of clinical change (ISI) from baseline  
9  
10 to 3 months, and from baseline to 6 months.  
11  
12  
13  
14

## 15 **Methods and Analysis**

### 16 **Trial design**

17  
18  
19 This is a pragmatic, multicentre, individually, randomised, parallel group, superiority trial to  
20  
21 test whether nurse-delivered SRT(+SH), compared to SH alone, reduces insomnia severity.  
22  
23 Both groups will receive treatment as usual without restriction. Participants will be recruited  
24  
25 from general practices across three regions in the UK (Thames Valley, Greater Manchester  
26  
27 and Lincolnshire). Assessments will take place at baseline, 3, 6 and 12 months post-  
28  
29 randomisation (see Figure 1 for trial flow). The trial is prospectively registered with the  
30  
31 ISRCTN (ISRCTN42499563). There is a Trial Steering Committee and Data Monitoring and  
32  
33 Ethics Committee, both comprised of majority independent members.  
34  
35  
36  
37  
38  
39  
40

41 [INSERT Figure 1]  
42  
43

### 44 **Participants and recruitment**

45  
46  
47 We aim to recruit participants aged 18 years and above in primary care practices who meet  
48  
49 criteria for insomnia disorder. Since insomnia is not commonly coded within practice records  
50  
51 we will search records for broad sleep-related terms, sleep-related medications and associated  
52  
53 conditions to identify those most likely to be eligible, while applying exclusionary diagnoses.  
54  
55 We will send invitations to identified individuals. We will also identify potential participants  
56  
57 through a) direct face-to-face GP referral (participants will be provided with an information  
58  
59  
60

1  
2  
3 sheet and contact details for the research team); b) placing posters in practices (containing  
4 study contact details) and c) posting study adverts on the internet (e.g., practice websites,  
5 Facebook).  
6  
7  
8  
9

10  
11 Participants will be screened for eligibility over the phone by the research team, or through  
12 self-completion of an online questionnaire. The inclusion criteria are as follows: a)  
13 participant is willing and able to give informed consent for participation; b) screen positive  
14 for insomnia symptoms on the Sleep Condition Indicator (SCI; 30) and meet DSM-5 criteria  
15 for insomnia disorder; c) self-reported sleep efficiency < 85% over the past month; d) age  
16  $\geq 18$  years; and e) able to attend appointments during baseline and 4-week intervention (both  
17 face-to-face at the practice and over the phone) and adhere to study procedures.  
18  
19  
20  
21  
22  
23  
24  
25  
26  
27

28 Exclusions will be limited principally to conditions which may be contraindicated for SRT, or  
29 render SRT inappropriate or ineffective: a) pregnant/pregnancy planning in the next 6  
30 months; b) additional sleep disorder diagnosis (e.g., restless legs syndrome, obstructive sleep  
31 apnoea, narcolepsy) or “positive” screen on screening questionnaire (31); c) dementia or mild  
32 cognitive impairment; d) diagnosis of epilepsy, schizophrenia or bipolar disorder; e) current  
33 suicidal ideation with intent (32) or attempted suicide within past 2 months; f) currently  
34 receiving cancer treatment or planned major surgery during treatment phase; g) night,  
35 evening, early morning or rotating shift-work; h) currently receiving psychological treatment  
36 for insomnia from a health professional or taking part in an online treatment programme for  
37 insomnia; and i) life expectancy of <2 years.  
38  
39  
40  
41  
42  
43  
44  
45  
46  
47  
48  
49  
50

## 51 **Interventions**

### 52 **Sleep hygiene (SH)**

53  
54  
55 Usual care for persistent insomnia typically involves sleep hygiene advice, repeat hypnotic  
56 prescription, and use of sedative antidepressants or antihistamines (14,15). For those aged  
57  
58  
59  
60

1  
2  
3 55+ years, melatonin may also be prescribed for insomnia, consistent with English guidelines  
4 from the National Institute for Health and Care Excellence (NICE; 13). Evidence shows that  
5  
6 access to and awareness of CBT for insomnia in primary care is very limited (14).  
7  
8  
9

10  
11 Since NICE recommends that individuals with persistent insomnia should receive sleep  
12 hygiene advice, it is likely that some participants will have been exposed to such information  
13 in the past. Therefore, to avoid bias, all participants in both arms will be provided with the  
14 same standardised sleep hygiene information. We will provide a booklet comprising standard  
15 behavioural guidance about lifestyle and environmental factors associated with sleep and  
16 sleeplessness (33). Participants randomised to the SH arm will be sent their booklet via email  
17 or post.  
18  
19  
20  
21  
22  
23  
24  
25  
26  
27

28 Consistent with the requirements of a pragmatic trial, there will be no restrictions upon usual  
29 care for both groups. In this way, the trial represents a comparison of SRT+SH (+treatment as  
30 usual, TAU) vs. SH (+TAU), permitting clear judgment to be made regarding the relative  
31 clinical utility of SRT in routine clinical practice.  
32  
33  
34  
35  
36  
37

### 38 **Sleep restriction therapy (SRT)**

39  
40  
41 Participants in the intervention arm will be offered nurse-delivered insomnia therapy in the  
42 form of SRT, a manualised behavioural intervention. See *Supplementary Table 1* for a  
43 detailed description of the intervention according to the template for intervention description  
44 and replication (TIDieR) checklist (34). Nurses will receive a four-hour training session on  
45 insomnia and the delivery of SRT as well as access to supporting resources (e.g. recorded  
46 video clips and a list of frequently asked questions and answers in relation to treatment  
47 delivery). Trained nurses will deliver manualised SRT over four brief, weekly sessions [total  
48 contact time = approximately 1hr 5 mins]. In session 1 the nurse will work through slides  
49 with the participant to introduce the rationale for SRT alongside a review of sleep diaries,  
50  
51  
52  
53  
54  
55  
56  
57  
58  
59  
60

1  
2  
3 selection of bed and rise-times, management of daytime sleepiness (including implications  
4 for driving), and discussion of barriers/facilitators to implementation. Participants will also be  
5 provided with a booklet to read in their own time, which includes information on theory  
6 underlying SRT and a list of sleep hygiene guidelines. Participants will be provided with  
7 diaries and sleep efficiency calculation grids to support implementation of SRT instructions  
8 and permit weekly review of progress. Sessions 2, 3 and 4 will be brief sessions (10-15  
9 minutes) to review progress, trouble-shoot any difficulties and advise upon adaptation of the  
10 sleep schedule (35). Sessions 1 and 3 will be in-person at the practice while sessions 2 and 4  
11 will be over the phone.  
12  
13  
14  
15  
16  
17  
18  
19  
20  
21  
22  
23

### 24 **Randomisation and blinding**

25  
26  
27  
28 Participants will be randomised (1:1) to SRT+SH or SH using a fully validated web-based  
29 randomisation program (Sortition), with a non-deterministic minimisation algorithm to  
30 balance region (Thames Valley, Lincolnshire, Greater Manchester), use of prescribed sleep  
31 promoting medication (yes/no), age (18-65 yrs vs > 65yrs), sex, baseline insomnia severity  
32 (ISI [36] score <22 vs. 22-28) and depression symptom severity (PHQ-9 [37] score <10 vs.  
33 10-27) across the two groups.  
34  
35  
36  
37  
38  
39  
40  
41

42 This is an open-label study and therefore both participants and nurses will be aware of  
43 allocation. The participant information sheet will inform participants that the study compares  
44 two different sleep intervention programmes but will not reveal the study hypothesis.  
45 Treatment providers (nurses) will not be involved in the collection of trial outcomes.  
46 Outcomes (questionnaires, diaries and actigraphy) are self-completed, remotely, by  
47 participants. It will be impractical to blind the research team. The statisticians will remain  
48 blind to group allocation.  
49  
50  
51  
52  
53  
54  
55  
56  
57  
58

### 59 **Assessments**

1  
2  
3 The primary outcome is insomnia severity assessed by the insomnia severity index (ISI; 36),  
4 and will be measured at baseline, 3, 6, and 12 months post-randomisation. Secondary  
5 outcomes will similarly be measured at all four time-points and they are health-related quality  
6 of life (SF-36; 38), sleep-related quality of life (GSII; 3), depressive symptoms (PHQ-9; 37),  
7 work productivity and activity impairment (WPAI; 39), sleep effort (GSES; 40) and pre-sleep  
8 arousal (PSAS; 41). Questionnaires will be completed online or on paper, depending on  
9 participant preference. Self-reported sleep and use of sleep medication will be captured over  
10 7 days using the consensus sleep diary (42) collected at baseline, 6 and 12 months. The  
11 consensus sleep diary will also be completed by the SRT group during the 4-week  
12 intervention phase. Actigraphy-defined sleep (CamNtech Ltd., MotionWatch 8) will be  
13 measured at baseline, 6 and 12 months. A modified version of the client service receipt  
14 inventory (CSRI; 43) and the EQ-5D-3L (44) will be administered at baseline, 3, 6 and 12  
15 months to inform the cost-effectiveness evaluation. Participants will receive vouchers for  
16 completion of outcomes at each assessment point [vouchers = £5 at baseline, £10 at 3  
17 months, £15 at 6 months and £10 at 12 months]. A summary of outcomes in relation to study  
18 objectives can be found in Table 1.

19  
20  
21  
22  
23  
24  
25  
26  
27  
28  
29  
30  
31  
32  
33  
34  
35  
36  
37  
38  
39  
40  
41 [INSERT Table 1]  
42  
43  
44

### 45 **Process evaluation**

46  
47 Consistent with MRC guidance for trials of complex interventions we will conduct a process  
48 evaluation (45). The aim of the process evaluation is to explore nurse-delivered SRT in the  
49 primary care setting by examining implementation, mechanisms of impact, and contextual  
50 factors that facilitate or impede intervention delivery. This will complement the outcomes  
51 evaluation, helping to understand the trial results through exploring:  
52  
53  
54  
55  
56  
57

- 58 (i) nurse perceptions of SRT, including training and support

- 1
- 2
- 3 (ii) fidelity of intervention delivery by nurses
- 4
- 5 (iii) whether participants in the control group also receive SRT (i.e. contamination)
- 6
- 7
- 8 (iv) the participant experience of SRT, including reflections on implementing the sleep
- 9
- 10 schedule and perceptions of benefit, as well as any unexpected consequences
- 11
- 12 (v) whether level of adherence mediates degree of clinical improvement
- 13
- 14 (vi) views of primary care staff in relation to the implementation of SRT beyond the
- 15
- 16 context of the trial.
- 17
- 18
- 19
- 20
- 21

22 In order to capture experiences and perceptions of SRT semi-structured interviews will be  
23 conducted by the research team with a sample of practice nurses (n=15), trial participants  
24 (n=15) and practice managers or GPs (n=15) across the three study sites. These will be in-  
25 depth semi-structured telephone, *Skype* or face-to-face interviews lasting 30-60 minutes using  
26 separate interview schedules for each group. Consent process and interviews will be digitally  
27 audio recorded and transcribed verbatim. Professionals will be asked about their working role  
28 in relation to delivering the SRT intervention. Participant interviews will take place after the  
29 intervention phase. Participants will receive a £10 voucher for interview participation.  
30  
31  
32  
33  
34  
35  
36  
37  
38  
39  
40  
41  
42

43 To enable fidelity assessment, all in-person SRT sessions will be recorded (if participants  
44 consent). A sample of these sessions will be rated by a trained member of the research team.  
45 We will monitor potential for control group contamination (i.e. SH participants accessing  
46 SRT via the trained practice nurse) through questionnaire (43) completion at 3 and 6 months  
47 follow-up. SRT engagement will be measured with respect to number of treatment sessions  
48 attended, while adherence to therapeutic instructions (prescribed bed and rise-times) will be  
49 quantified from sleep diaries recorded during the 4-week intervention phase.  
50  
51  
52  
53  
54  
55  
56  
57  
58  
59  
60

### Sample size

1  
2  
3 To detect a difference on the ISI of 1.35 points (standard deviation=4.50) between the group  
4 means of SRT+SH and SH, with a power of 90% at 5% level of significance (2-sided), 235  
5 participants would be required in each treatment group. The standard deviation was based on  
6 the results from the primary care evaluation of SRT conducted by Falloon and colleagues  
7 (25). Accounting for 20% attrition the total number of participants required to be recruited is  
8 588 (294 per group). Should attrition be higher, at 25% or 30%, the total number of  
9 participants required would be 628 (314 per group) or 672 (336 per group), respectively.  
10  
11  
12  
13  
14  
15  
16  
17  
18  
19  
20  
21  
22

23 Most CBT evaluations show large effects on the ISI (46) but these studies have small  
24 samples, are tightly controlled and recruit participants from the community, who are  
25 generally free from comorbidity or medication. Given that our study is a pragmatic trial,  
26 across multiple NHS sites, with a varied group of insomnia patients (representing clinical  
27 reality), we would anticipate a lower effect size for the ISI. Falloon and colleagues (25)  
28 recruited a highly selected group of patients and delivered treatment via one research GP,  
29 observing an effect size of 0.54 at 6 months on the ISI. Thus, powering the study for a  
30 moderate standardised effect size of 0.3 is conservative and appropriate given our design  
31 features. The sample size will also allow us to detect an average difference of 2.7 points  
32 [standard deviation=9.0 (47)] on the SF-36 (HRQoL), our important secondary outcome, at  
33 90% power and 5% level of significance.  
34  
35  
36  
37  
38  
39  
40  
41  
42  
43  
44  
45  
46  
47  
48

49 For the interviews we aim to recruit 15 participants, consistent with our previous experience  
50 of Framework analysis (48) and guidelines recommending that a minimum of 12 interviews  
51 are needed to achieve data saturation (49).  
52  
53  
54  
55  
56

### 57 **Adverse events**

58  
59  
60



1  
2  
3 The likelihood of serious adverse events (SAEs) occurring due to treatment is low since  
4 neither CBT-I/SRT nor sleep hygiene advice have been reported to cause them. We define  
5 SAEs as any untoward medical occurrence that either: a) results in death; b) is life-  
6 threatening; c) requires inpatient hospitalisation or prolongation of existing hospitalisation; d)  
7 results in persistent or significant disability/incapacity; or d) consists of a congenital anomaly  
8 or birth defect. Therapists and participants will be prompted to self-report SAEs. Along with  
9 self-reporting of SAEs, we will also use responses on the CSRI (43) - which includes  
10 questions on hospitalisations - to follow-up participants who report being hospitalised. We  
11 will record planned hospital admissions at baseline and, when they occur, these will not be  
12 counted as SAEs. SAEs will be assessed for severity, seriousness and relatedness to study  
13 procedures by a medically qualified member of the team. SAEs will be reported after date of  
14 randomisation until either the date of trial withdrawal or 6-month follow-up completion,  
15 whichever is earlier.

16  
17 Because implementation of SRT may be associated with increased sleepiness we will also  
18 record falls, accidents (including road-traffic accidents and work-related injuries) and near-  
19 miss driving incidents alongside outcomes at baseline, 3, 6, and 12 months post-  
20 randomisation and report these by randomised group.

## 21 **Analysis Plan**

### 22 *Statistical Analysis*

23  
24 The primary statistical analysis will be carried out on the basis of intention-to-treat (ITT). We  
25 will endeavour to obtain full follow-up data on every participant to allow full ITT analysis,  
26 but we will inevitably experience the problem of missing data due to withdrawal, loss to  
27 follow-up, or nonresponse to some questionnaire items. The results from the trial will be  
28 prepared as comparative summary statistics with 95% confidence intervals. All the tests will  
29  
30

1  
2  
3 be performed at a 5% two-sided significance level. The study results will be reported in  
4  
5 accordance with the Consolidated Standards of Reporting Trials (CONSORT) guidelines  
6  
7 (50). A full detailed statistical analysis plan will be prepared and finalised before data  
8  
9 collection is complete.  
10  
11  
12  
13

14  
15 A three-level mixed effect linear model based on an unstructured covariance matrix will be  
16  
17 fitted to the primary outcome data (ISI at 6 months), utilising 3, 6 and 12-month time-points.  
18  
19 Practice and participant will be included as random effects. Fixed effects will include  
20  
21 randomised group, baseline ISI score, stratification variables, time and a time by randomised  
22  
23 group interaction term to allow estimation of treatment effect at each time point.  
24  
25  
26  
27

28  
29 Missing data will be reported (alongside reasons for missingness where available) and the  
30  
31 missing data pattern will be explored, though the mixed effects model implicitly accounts for  
32  
33 data missing at random. Standard residual diagnostics will be assessed for the appropriateness  
34  
35 of the model and if assumptions are violated we will consider alternative non-parametric  
36  
37 approaches for the main analysis. Continuous secondary outcomes will be analysed using the  
38  
39 same method. Secondary outcomes that are binary (e.g. zero hypnotic use over 7 days) or  
40  
41 count variables (e.g. number of nights hypnotic-free over 7 nights) will be analysed using  
42  
43 generalised linear mixed effect models with appropriate link function. We will undertake pre-  
44  
45 specified sub-group analysis of the primary outcome by actigraphy-defined sleep duration at  
46  
47 baseline ( $< 6$ hrs vs.  $\geq 6$ hrs). Mediation analyses will be conducted using the approach of  
48  
49 Baron and Kenny (51) but will follow the adaptation in Freeman et al (52) which makes use  
50  
51 of linear mixed effects models. This will allow us to determine the extent to which the 3-  
52  
53 month arousal outcomes (PSAS, GSES) mediate the 6-month ISI outcome. All models will  
54  
55 include the baseline assessments of the mediator and ISI as covariates. A complier-average  
56  
57  
58  
59  
60

1  
2  
3 causal effect (CACE) analysis of the primary outcome will be carried out to determine the  
4 impact of the treatment effect when accounting for non-compliance of the allocated  
5 intervention (i.e. SRT session attendance). CACE is a measure of the causal effect of an  
6 intervention for participants who received it as intended by the original group allocation. We  
7 will also explore the effect of level of adherence to prescribed bed and rise-times (captured  
8 by sleep diaries) on the primary outcome in those who received SRT.  
9  
10  
11  
12  
13  
14  
15  
16

### 17 *Economic analysis*

18  
19  
20 A within-trial economic evaluation alongside the RCT will estimate the incremental cost-  
21 effectiveness of SRT+SH over SH, from both NHS and societal perspectives. In our  
22 economic analyses we will adopt the UK NHS and personal social services perspective,  
23 consistent with NICE guidelines (53). Additional analyses will examine costs from a societal  
24 perspective, quantifying productivity losses in relation to absenteeism and presenteeism.  
25  
26  
27  
28  
29  
30  
31  
32

33 From trial records we will quantify participants' attendance at SRT sessions and hence nurse  
34 time and also assess the resources used in training. We will collect data on health care usage  
35 through GP records (medication use) and a self-reported version of CSRI (43). The Personal  
36 Social Services Research Unit (PSSRU) Costs of Health and Social Care (54) and NHS  
37 Reference Costs (55) will be used to apply national average unit costs to service utilisation  
38 and construct a cost profile per participant. Productivity will be quantified from the Work  
39 Productivity and Activity Impairment (WPAI; 39) questionnaire, and costed using the human  
40 capital approach.  
41  
42  
43  
44  
45  
46  
47  
48  
49  
50

51  
52 Analysis of the ISI (assessed at baseline, 3, 6 and 12 months) will indicate the incremental  
53 cost per unit change in self-reported insomnia severity. As recommended by NICE, cost-  
54 utility analysis will examine incremental QALYs. This will be achieved through collecting  
55 data on health status using the EQ-5D-3L (44) at baseline, 3, 6 and 12 months, and  
56  
57  
58  
59  
60

1  
2  
3 calculating the area under the curve. An incremental cost-effectiveness ratio will be  
4  
5 calculated using costs-per-QALY with a 12-month time horizon. We will add a sleep  
6  
7 dimension (56) to the standard EQ-5D-3L allowing us to examine, in exploratory analysis,  
8  
9 the relationship between sleep bolt-on responses and other measures of insomnia severity, to  
10  
11 identify whether the sleep question correlates with other measures of sleep satisfaction and  
12  
13 self-reported health. Probabilistic and deterministic sensitivity analysis will be conducted to  
14  
15 characterise the uncertainty around the cost-effectiveness estimates.  
16  
17  
18  
19

### 20 *Qualitative analysis*

21  
22 We will use a Framework approach (57) for qualitative data analysis supported by QSR  
23  
24 NVivo (version 11), with the framework based on the main areas of implementation,  
25  
26 mechanisms of impact, and contextual factors together with the more detailed issues that arise  
27  
28 from these. Analysis will occur as the interviews are transcribed and this analysis will allow  
29  
30 schedules and data collection to be further developed. We will analyse qualitative process  
31  
32 data prior to knowing trial outcomes to avoid biased interpretation.  
33  
34  
35  
36  
37  
38

### 39 **Patient and public involvement**

40  
41 Four people from the Healthier Ageing Public and Patient Involvement (HAPPI) group,  
42  
43 University of Lincoln, read and provided detailed comments on the original grant proposal,  
44  
45 helping to shape key methodological choices (e.g., measurement selection). Two individuals  
46  
47 will contribute during the trial by reviewing participant information sheets, consent form,  
48  
49 therapy workbooks and questionnaire measures. They will advise on recruitment procedures  
50  
51 and methods to engage prospective participants/ retain enrolled participants. Finally they will  
52  
53 support the dissemination of trial results through review of the final report to the funder, lay  
54  
55 summary (which we will send to trial participants on completion of analysis), and media  
56  
57 releases by the University of Oxford.  
58  
59  
60

### **Ethics and dissemination**

The trial has received both Health Research Authority approval (IRAS: 238138) and ethical approval (Yorkshire & the Humber - Bradford Leeds Research Ethics Committee, reference: 18/YH/0153). We will publish our findings in high-impact, peer-reviewed journals. We will send trial participants a summary of study outcomes.

### **Trial status**

The trial commenced recruitment in August 2018 and will continue recruiting until approximately March 2020, with final outcome data expected around April 2021.

### **Contributors**

SDK is the Chief Investigator, conceived the project, had overall responsibility for the trial design and treatment design, and drafted the trial protocol. CM contributed to the trial protocol and drafted the manuscript. PA, CAE, PB, NS, LMY, LA, EO, SA contributed to trial design. SDK, CAE and NS contributed to treatment design. LMY is responsible for statistical analysis. LA is responsible for economic analysis. NS/SA are responsible for the process evaluation analysis. NB is the Trial Manager. Centre leads are SDK/PA (Oxford), PB (Greater Manchester) and NS (Lincoln).

### **Funding**

The trial is funded by the National Institute for Health Research Health Technology Assessment Programme. HTA Project: 16/84/01. SDK and CE are supported by the National Institute for Health Research (NIHR) Oxford Biomedical Research Centre (BRC) based at Oxford University Hospitals NHS Trust and the University of Oxford. The views expressed

1  
2  
3 are those of the authors and not necessarily those of the NHS, the NIHR or the Department of  
4  
5 Health.  
6  
7

### 8 **Competing interests**

9  
10  
11  
12 Colin Espie is co-founder of and shareholder in Big Health Ltd, a company which specialises  
13  
14 in the digital delivery of cognitive behavioural therapy for sleep improvement (the Sleepio  
15  
16 programme). This study is in no way connected to Big Health Ltd or Sleepio. SDK declares  
17  
18 non-financial support from Big Health Ltd. in relation to no-cost access to Sleepio for use in  
19  
20 clinical trial research. All other authors declare no competing interests.  
21  
22  
23  
24  
25  
26  
27  
28  
29  
30  
31  
32  
33  
34  
35  
36  
37  
38  
39  
40  
41  
42  
43  
44  
45  
46  
47  
48  
49  
50  
51  
52  
53  
54  
55  
56  
57  
58  
59  
60

## References

1. American Psychiatric Association. Diagnostic and Statistical Manual of Mental Disorders (5th ed.). American Psychiatric Association, Arlington, VA, 2013.
2. Kyle SD, Espie CA, Morgan K. “..Not just a minor thing, it is something major, which stops you from functioning daily’: Quality of Life and Daytime Functioning in Insomnia”. *Behav Sleep Med* 2010; 8: 123-140.
3. Kyle SD, Crawford M, Morgan K, Spiegelhalder K, Clark A, Espie CA. The Glasgow Sleep Impact Index (GSII): a novel patient-centred measure for assessing sleep-related quality of life impairment in Insomnia Disorder. *Sleep Med* 2013; 14: 493-501.
4. Morin CM, Benca R. Chronic insomnia. *Lancet* 2012; 379: 1129-41.
5. Vgontzas AN, Fernandez-Mendoza J, Duanping L, Bixler EO. Insomnia with objective short sleep duration: The most biologically severe phenotype of the disorder. *Sleep Med Rev* 2013; 17: 241-254.
6. Lane JM, Jones SE, Dashti HS, et al. Biological and clinical insights from genetics of insomnia symptoms. *Nature Genetics* 2019; 51: 387-393.
7. Wickwire EM, Shaya FT, Scharf SM. Health economics of insomnia treatments: The return on investment for a good night’s sleep. *Sleep Med Rev* 2016; 28: 72-82.
8. Daley M, Morin CM, LeBlanc M, Gregoire JP, Savard J. The economic burden of insomnia: direct and indirect costs for individuals with insomnia syndrome, insomnia symptoms and good sleepers. *Sleep* 2009; 32: 55-64.
9. Leger D, Bayon V. Societal costs of insomnia. *Sleep Med Rev* 2010; 14:379-389.
10. van der Zwerde T, Bisdounis L, Kyle S.D., Lancee J, van Straten A. Long-term effects of cognitive behavioral therapy for insomnia: a meta-analysis. *Sleep Med Rev* 2019; 12: 101208. doi: 10.1016/j.smr.2019.08.002. [Epub ahead of print]
11. Qaseem A, Kansagara D, Forcica MA, et al. Management of chronic insomnia disorder in adults: A clinical practice guideline from the American College of Physicians. *Ann Intern Med* 2016; 165: 126-133.
12. Riemann D, Baglioni C, Bassetti C, et al. European guideline for the diagnosis and treatment of insomnia. *J Sleep Res* 2017; 26:675-700.
13. National Institute for Health and Care Excellence. <http://cks.nice.org.uk/insomnia#!scenario:1>
14. Everitt H, McDermott L, Leydon G, Yules H, Baldwin D, Little P. GPs’ management strategies for patients with insomnia: a survey and qualitative interview study. *Br J Gen Pract* 2014; 64: e112-e119.
15. Siriwardena AN, Qureshi MZ, Dyas JV, Orner R. Magic bullets for insomnia? Patients’ use and experiences of newer (Z drugs) versus older (benzodiazepine) hypnotics for sleep problems in primary care. *Br J Gen Pract* 2008; 58: 417-422.
16. Everitt H, Baldwin DS, Stuart B, et al. Antidepressants for insomnia in adults. *Cochrane Database Syst Rev* 2018  
<https://doi.org/10.1002/14651858.CD010753.pub2>
17. Buysse DJ, Germain A, Moul DE, et al. Efficacy of brief behavioural treatment for chronic insomnia in older adults. *Arch Intern Med* 2011; 171:887-95.
18. Espie CA, Inglis SJ, Tessler S, Harvey L. The clinical effectiveness of cognitive behavior therapy for chronic insomnia: implementation and evaluation of a sleep clinic in general medical practice. *Behav Res Ther* 2001; 39: 45-60.
19. Espie CA, MacMahon KM, Kelly HL, Broomfield NM, Douglas NJ, Engleman HM, et al. Randomized clinical effectiveness trial of nurse-administered small-group cognitive behavior therapy for persistent insomnia in general practice. *Sleep* 2007; 30: 574-84.
20. Espie CA, Fleming L, Cassidy J, Samuel L, Taylor L, White C. et al. Randomized controlled clinical effectiveness trial of cognitive behavior therapy compared with

- 1  
2  
3 treatment as usual for persistent insomnia in patients with cancer. *J Clin Oncol* 2008; 26:  
4 4651-4658.
- 5  
6 21. Maurer LF, Espie, CA, Kyle SD. How does sleep restriction therapy for insomnia work? A  
7 systemic review of mechanistic evidence and the introduction of the Triple-R model.  
8 *Sleep Med Rev* 2018; 42:127-138.
- 9  
10 22. Miller CB, Espie CA, Epstein DR, Friedman L, Morin CM, Pigeon WR, Spielman AJ,  
11 Kyle SD. The evidence-base of sleep restriction therapy for treating insomnia disorder.  
12 *Sleep Med Rev* 2014; 18: 415-24.
- 13  
14 23. Krieger T, Urech A, Duss SB, et al. A randomized controlled trial comparing guided  
15 internet-based multi-component treatment and internet-based guided sleep restriction  
16 treatment to care as usual in insomnia. *Sleep Med* 2019;62:43-52.
- 17  
18 24. Drake CL, Kalmbach DA, Arnedt JT, et a. Treating chronic insomnia in postmenopausal  
19 women: a randomized clinical trial comparing cognitive-behavioral therapy for insomnia,  
20 sleep restriction therapy, and sleep hygiene education. *Sleep* 2019;42:  
21 <https://doi.org/10.1093/sleep/zsy217>
- 22  
23 25. Falloon K, Elley CR, Fernando 3<sup>rd</sup> A, Lee AC, Arroll B. Simplified sleep restriction for  
24 insomnia in general practice: a randomized controlled trial. *Br J Gen Pract* 2015; 65:  
25 e508-15.
- 26  
27 26. Kyle SD, Morgan K, Spiegelhalter K, Espie CA. No pain, no gain: An exploratory within-  
28 subjects mixed-methods evaluation of the patient experience of sleep restriction therapy.  
29 *Sleep Med* 2011; 12: 735-747.
- 30  
31 27. Sargent GM, Forrest LE, Parker RM. Nurse delivered lifestyle interventions in primary  
32 health care to treat chronic disease risk factors associated with obesity: a systematic  
33 review. *Obesity Rev* 2012; 13: 1148-71.
- 34  
35 28. Morgan K, Dixon S, Mathers N, Thompson J, Tomeny M. Psychological treatment for  
36 insomnia in the management of long-term hypnotic drug use: a pragmatic randomized  
37 controlled trial. *Br J Gen Pract* 2003; 53:923-8.
- 38  
39 29. Morgan, K., Gregory, P., Tomeny, M., David, B.M., Gascoigne, C. Self-help treatment for  
40 insomnia symptoms associated with chronic conditions in older adults: a randomized  
41 controlled trial. *J Am Geriatric Soc* 2012;60:1803-10.
- 42  
43 30. Espie CA, Kyle SD, Hames P, Gardani M, Fleming L, Cape J. The Sleep Condition  
44 Indicator: a clinical screening tool to evaluate Insomnia Disorder. *BMJ Open* 2014;  
45 4:e004183 doi:10.1136/bmjopen-2013-004183.
- 46  
47 31. Wilson SJ, Nutt DJ, Alford C, et al. British Association for Psychopharmacology  
48 consensus statement on evidence-based treatment of insomnia, parasomnias and circadian  
49 rhythm disorders. *J Psychopharmacol* 2010;24(11):1577-1600.
- 50  
51 32. Beck AT, Ward CH, Mendelson M, Mock J, Erbaugh J. An inventory for measuring  
52 depression. *Arch Gen Psychiatry* 1961; 6: 561-71.
- 53  
54 33. Espie CA, Emsley R, Kyle SD., et al. The impact of treating insomnia upon functional  
55 health, psychological wellbeing and sleep-related quality of life: a randomized controlled  
56 trial with mediation analysis. *JAMA Psych* 2018; doi: 10.1001/jamapsychiatry.2018.2745.
- 57  
58 34. Hoffman T, Glasziou PP, Boutron I, et al. Better reporting of interventions: template for  
59 intervention description and replication (TIDieR) checklist and guide. *BMJ*  
60 2014;348:g1687 10.1136/bmj.g1687.
35. Kyle SD, Acquino R, Henry A, Crawford M, Miller C, Espie CA, Spielman A. Towards  
standardisation and improved understanding of Sleep Restriction Therapy for insomnia  
disorder: A systematic review of CBT-I trial content. *Sleep Med Rev* 2015; 23: 83-88.
36. Morin CM, Belleville G, Belanger L, Ivers H. The insomnia severity index: psychometric  
indicators to detect insomnia cases and evaluate treatment response. *Sleep* 2011 34:601-  
608.



- 1
- 2
- 3
- 4 37. Kroenke K, Spitzer RL, Williams JB, Löwe B. The PHQ-9: validity of a brief depression
- 5 severity measure. *J Gen Intern Med* 2001;32:345–359.
- 6 38. Ware JE, Sherbourne CD. The Mos 36-Item Short-Form Health Survey (Sf-36) .1.
- 7 Conceptual-Framework and Item Selection. *Med Care* 1992; 30: 473-83.
- 8 39. Reilly MC, Zbrozek AS, Dukes EM. The validity and reproducibility of a work
- 9 productivity and activity impairment instrument. *Pharmacoeconomics* 1993; 4:353-65.
- 10 40. Broomfield NM, Espie CA. Towards a valid, reliable measure of sleep effort. *J Sleep*
- 11 *Res* 2005; 14: 401–407.
- 12 41. Nicassio PM, Mendlowitz DR, Fussell JJ, Petras L. The phenomenology of the pre-
- 13 sleep state: The development of the pre-sleep arousal scale. *Behav Res Ther* 1985; 23:
- 14 263–271.
- 15 42. Carney CE, Buysse DJ, Ancoli-Israel S, Edinger JD, Krystal AD, Lichstein KL, Morin
- 16 C.M. The consensus sleep diary: standardizing prospective sleep self-monitoring. *Sleep*
- 17 2012;35: 287-302.
- 18 43. Beecham J, Knapp M. (2001) Costing psychiatric interventions, in G. Thornicroft
- 19 (ed.) *Measuring Mental Health Needs*, Gaskell, 2<sup>nd</sup> edition, 200-224.
- 20 44. Rabin R, de Charoo F. EQ-5D: a measure of health status from the EuroQoL group. *Ann*
- 21 *Med* 2001;5:337-343.
- 22 45. Moore G, Audrey S, Barker M, et al. Process evaluation of complex interventions: Medical
- 23 Research Council guidance. *BMJ* 2015; 350: h1258
- 24 46. Van Straten A, van der Zweerde T, Kleiboer A, Cuijpers P, Morin CM, Lancee J.
- 25 Cognitive and behavioural therapies in the treatment of insomnia: a meta-analysis. *Sleep*
- 26 *Med Rev* 2018;38:3-16.
- 27 47. Abell JG, Shipley MJ, Ferrie JE, Kivimäki M, Kumari M. Association of
- 28 chronic insomnia symptoms and recurrent extreme sleep duration over 10 years with well-
- 29 being in older adults: a cohort study. *BMJ Open* 2016 Feb 1;6(2):e009501.
- 30 48. Dyas JV, Togher F, Siriwardena AN. Intervention fidelity in primary care complex
- 31 intervention trials: qualitative study using telephone interviews of patients and
- 32 practitioners. *Qual Prim Care* 2014; 22: 25-34.
- 33 49. Guest G, Bunce A, Johnson L. How many interviews are enough? An experiment with
- 34 data saturation and variability. *Field Methods* 2006; 18(1): 59-82.
- 35 50. Schlz KF, Altman DG, Moher D, for the CONSORT group. CONSORT 2010 Statement:
- 36 updated guidelines for reporting parallel group randomised trials. *Trials* 2010;11:32.
- 37 51. Baron R, Kenny DA. The moderator-mediator variable distinction in social psychological
- 38 research. *J Pers Soc Psychol* 1986; 5: 1173–82.
- 39 52. Freeman D, Sheaves B. et al. The effects of improving sleep on mental health (OASIS): a
- 40 randomised controlled trial with mediation analysis. *Lancet Psych* 2017; 4(10): 749-758.
- 41 53. National Institute for Health and Care Excellent (NICE). Developing NICE guidelines: the
- 42 manual. Process and methods [PMG20].
- 43 <https://www.nice.org.uk/process/pmg20/chapter/introduction-and-overview>
- 44 54. Curtis L, Burns A. Unit Costs of Health and Social Care 2018. Personal Social Services
- 45 Research Unit, University of Kent, Canterbury.
- 46 <https://doi.org/10.22024/UniKent/01.02.70995>
- 47 55. National Health Service (NHS) Reference Costs.
- 48 <https://improvement.nhs.uk/resources/reference-costs/>
- 49 56. Yang Y, Brazier J, Tsuchiya A. Effect of adding a sleep dimension to the EQ-5D
- 50 descriptive system: a “bolt-on” experiment. *Med Decis Making* 2014; 34:42-53.
- 51 57. Ritchie J, Lewis J. Qualitative research practice. SAGE Publications, London 2003.
- 52
- 53
- 54
- 55
- 56
- 57
- 58
- 59
- 60

1  
2  
3 List of tables and figures  
4  
5

6 *Table 1: Objectives and outcome measures*  
7

| Objectives                                                                                                                                                                                                                                                     | Outcome Measures                                                                                                                                                                                                                                                                                                                                                                                                                                                       | Timepoint(s) of evaluation of this outcome measure                                                                                                        |
|----------------------------------------------------------------------------------------------------------------------------------------------------------------------------------------------------------------------------------------------------------------|------------------------------------------------------------------------------------------------------------------------------------------------------------------------------------------------------------------------------------------------------------------------------------------------------------------------------------------------------------------------------------------------------------------------------------------------------------------------|-----------------------------------------------------------------------------------------------------------------------------------------------------------|
| <p>8<br/>9<br/>10<br/>11<br/>12<br/>13 <b>Primary Objective:</b><br/>14 To compare the effect of SRT+SH<br/>15 versus SH on insomnia severity</p>                                                                                                              | Self-rated insomnia severity using the ISI questionnaire                                                                                                                                                                                                                                                                                                                                                                                                               | Baseline, 3, 6- and 12-months post-randomisation.<br><i>Primary outcome is at 6 months.</i>                                                               |
| <p>16<br/>17<br/>18<br/>19 <b>Secondary Objectives:</b><br/>20 To compare the effect of SRT+SH<br/>21 versus SH on HRQoL</p>                                                                                                                                   | Self-rated HRQoL using the SF-36 questionnaire (Total Score, MCS, PCS)                                                                                                                                                                                                                                                                                                                                                                                                 | Baseline, 3, 6- and 12-months post-randomisation.                                                                                                         |
| To compare the effect of SRT+SH versus SH on subjective sleep                                                                                                                                                                                                  | Subjective sleep recorded over 7 nights using the CSD<br><br>(SOL;WASO;SE;TST;SQ)                                                                                                                                                                                                                                                                                                                                                                                      | Baseline, 6- and 12-months post-randomisation.                                                                                                            |
| To compare the effect of SRT+SH versus SH on objective estimates of sleep                                                                                                                                                                                      | Actigraphy-defined sleep over 7 nights<br><br>(SOL; WASO; SE; TST)                                                                                                                                                                                                                                                                                                                                                                                                     | Baseline, 6- and 12-months post-randomisation.                                                                                                            |
| To compare the effect of SRT+SH versus SH on 1) patient-generated quality of life; 2) depressive symptoms; 3) work productivity; 4) hypnotic medication use; 5) use of other prescribed sleep-promoting medications; and 6) pre-sleep arousal and sleep effort | <ol style="list-style-type: none"> <li>1. Self-rated quality of life using the GSII [Ranks 1,2,3]</li> <li>2. Self-rated depressive symptoms severity using the PHQ-9</li> <li>3. Self-rated WPAI questionnaire</li> <li>4. Use of prescribed hypnotics (quantified from 7-day diary)</li> <li>5. Use of other prescribed sleep-promoting medications (quantified from 7-day diary)</li> <li>6. Self-rated arousal and sleep effort using the PSAS and GSES</li> </ol> | Baseline, 3, 6- and 12-months post-randomisation.<br><br>Medication use will be quantified from diaries at baseline, 6- and 12-months post-randomisation. |
| To compare the incremental cost-effectiveness of SRT+SH over SH, from both NHS and societal perspectives                                                                                                                                                       | Trial records (time and number of nurse-led appointments), practice records* (medications), CSRI, ISI, WPAI, EQ-5D-3L                                                                                                                                                                                                                                                                                                                                                  | Baseline, 3, 6- and 12-months post-randomisation.<br><br>*Baseline and 12 months only                                                                     |
| To undertake a process evaluation to explain trial results and understand intervention delivery, fidelity and acceptability.                                                                                                                                   | Semi-structured interviews with 1) trial participants; 2) nurses; 3) GPs or practice managers.                                                                                                                                                                                                                                                                                                                                                                         | Throughout the trial.                                                                                                                                     |
| <i>Moderator analysis:</i>                                                                                                                                                                                                                                     | Actigraphy, ISI, GSII, SF-36                                                                                                                                                                                                                                                                                                                                                                                                                                           | Baseline and 6                                                                                                                                            |

|                                                                                                                                            |               |                                |
|--------------------------------------------------------------------------------------------------------------------------------------------|---------------|--------------------------------|
| Test whether objective short sleep duration at baseline (< 6hrs vs. ≥ 6hrs) moderates the effect of SRT on clinical outcomes (at 6 months) |               | months.                        |
| To compare the number of specified adverse events between the groups                                                                       | Questionnaire | Baseline, 3, 6, and 12 months. |

CSD = Consensus Sleep Diary; CSRI = client service receipt inventory; EQ-5D-3L = EuroQol questionnaire; GSES = Glasgow sleep effort scale; GSII = Glasgow sleep impact index; HRQoL = health-related quality of life; ISI = insomnia severity index; MCS = mental component summary score; PCS = physical component summary score; PHQ-9 = patient health questionnaire; PSAS = pre-sleep arousal scale; SE = sleep efficiency; SOL = sleep-onset latency; SF-36 = short-form 36 questionnaire; SH=sleep hygiene; SRT = sleep restriction therapy; SQ = sleep quality; TST= total sleep time; WASO = wake-time after sleep onset; WPAI = work productivity and activity impairment questionnaire.

For peer review only

Figure 1: Trial Flow

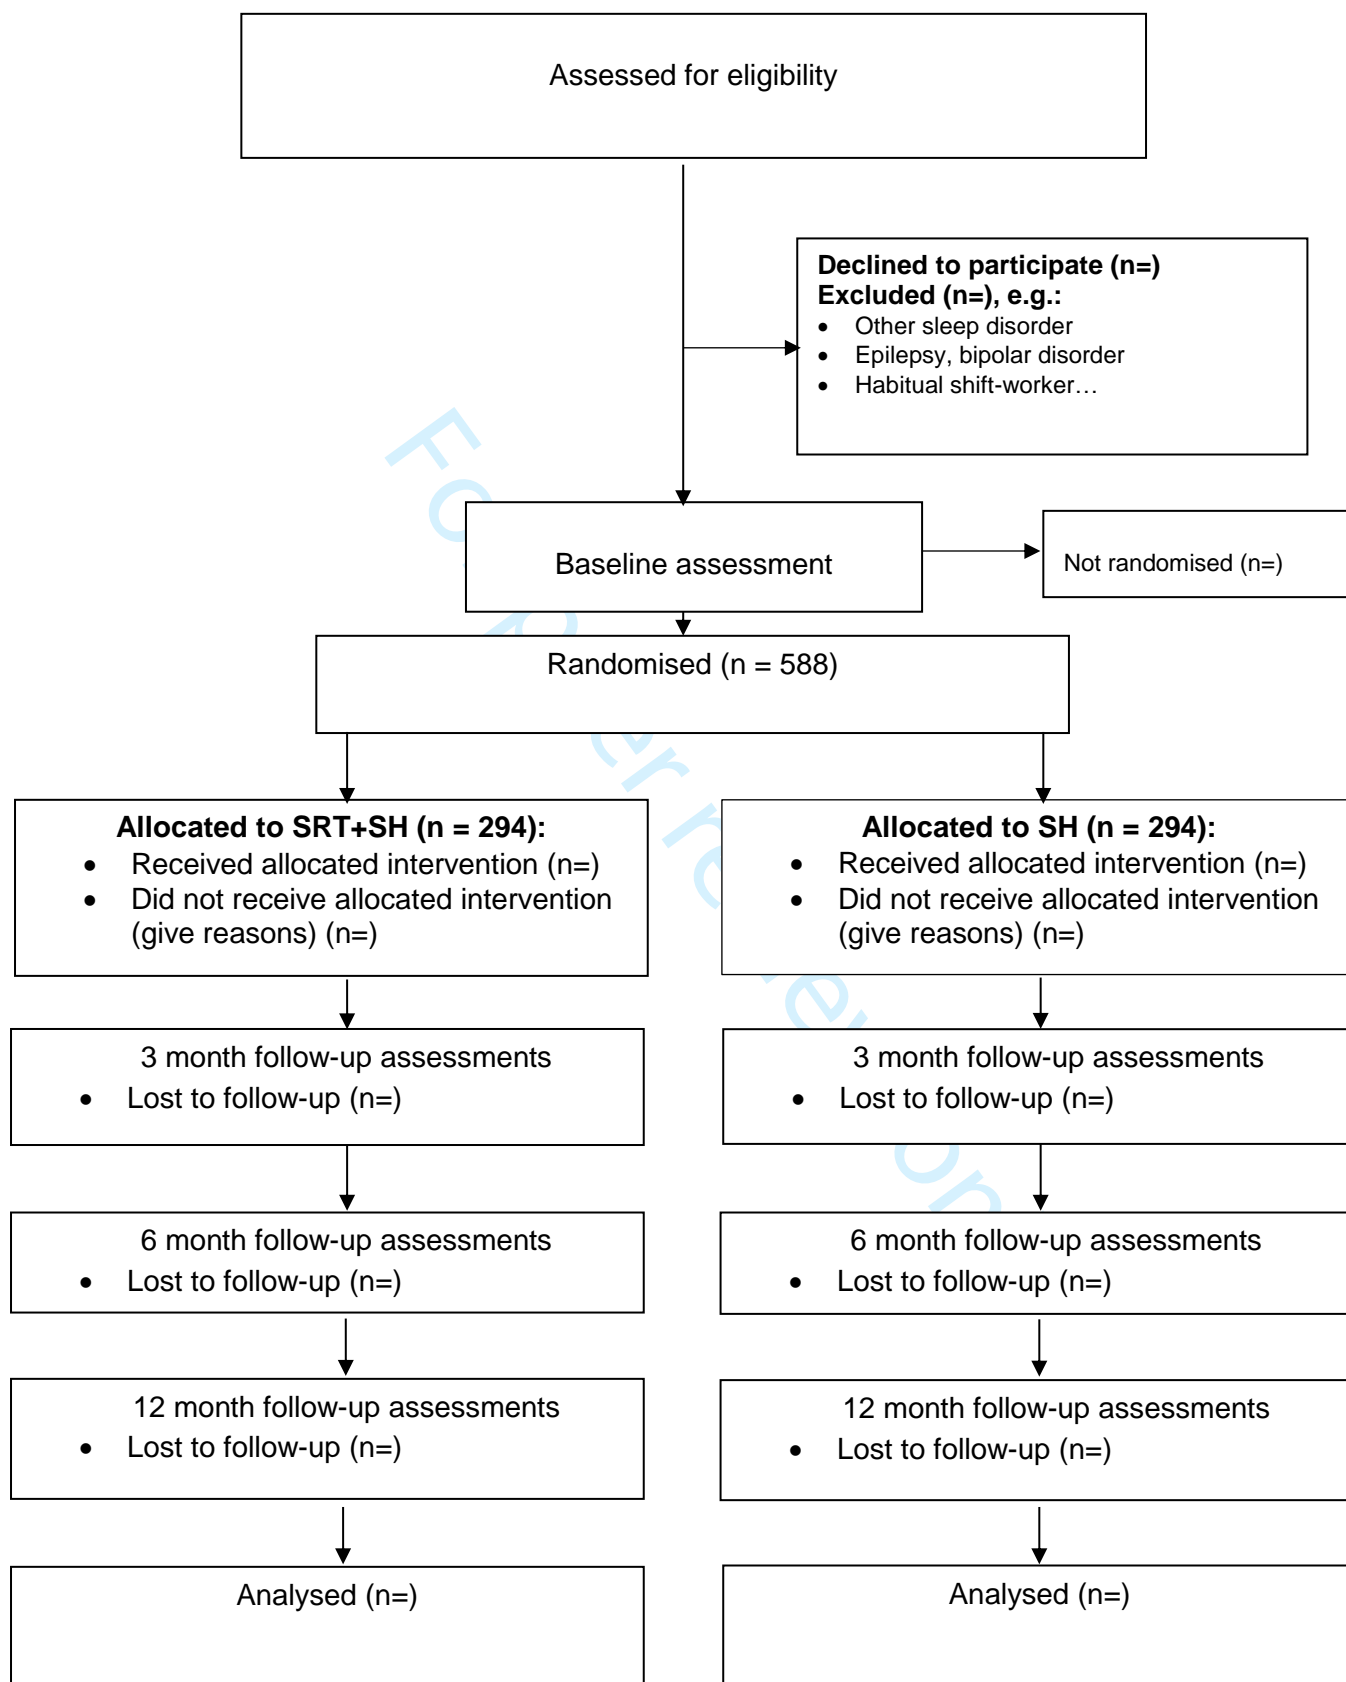

Supplementary Table 1: Template for Intervention Description and Replication (TIDieR) checklist

| <i>Name of intervention</i> | Sleep Restriction Therapy (SRT) for Insomnia Disorder                                                                                                                                                                                                                                                                                                                                                                                                                                                                                                                                                                                                                                                                                                                                                                                                                                                                                                                                                                                                                                                                                                                                                                                                                                                                                                                                                                                                                                              |
|-----------------------------|----------------------------------------------------------------------------------------------------------------------------------------------------------------------------------------------------------------------------------------------------------------------------------------------------------------------------------------------------------------------------------------------------------------------------------------------------------------------------------------------------------------------------------------------------------------------------------------------------------------------------------------------------------------------------------------------------------------------------------------------------------------------------------------------------------------------------------------------------------------------------------------------------------------------------------------------------------------------------------------------------------------------------------------------------------------------------------------------------------------------------------------------------------------------------------------------------------------------------------------------------------------------------------------------------------------------------------------------------------------------------------------------------------------------------------------------------------------------------------------------------|
| <i>Why</i>                  | Insomnia is assumed to be maintained, in part, by excessive amounts of time in bed and irregular sleep-wake schedules, which serve to fragment sleep. Time in bed awake further contributes to insomnia because the bed/bedroom environment may become associated with wakefulness over time; subsequently acting as a trigger for arousal and sleep fragmentation. SRT aims to: 1) restrict time in bed (to enhance sleep efficiency); 2) regularise the timing of the sleep-wake cycle; and 3) recondition the bed-sleep association (21).                                                                                                                                                                                                                                                                                                                                                                                                                                                                                                                                                                                                                                                                                                                                                                                                                                                                                                                                                       |
| <i>What: Materials</i>      | <p><i>Materials for patients:</i> patients will be provided with a folder at the beginning of the intervention. This folder contains: a copy of the slides used during session 1; worksheets to complete during sessions 1-4; sleep diaries and sleep efficiency grids to enable recording of sleep efficiency each day during the 4-week intervention period; and a booklet which contains enhanced information on the background and implementation of SRT, including quotes from patients who have previously undergone SRT, as well as guidance on sleep hygiene. This guidance briefly covers lifestyle behaviours (e.g., caffeine, alcohol use, exercise) and environmental factors (e.g., light, temperature) that influence sleep.</p> <p><i>Materials for nurses:</i> nurses will be provided with a training folder (as part of a 4-hour training session) which contains background information on sleep, insomnia and SRT. The folder also contains a list of frequently asked questions in relation to trouble-shooting and specific patient scenarios that may arise, with standardised guidance on how to navigate. Nurses will be provided with access to two recorded videos that give an overview of insomnia and SRT implementation.</p> <p>Nurses will be provided with a power-point slide set to work through with each patient during session 1. They will also work through a structured checklist (completed online) for each session to guide content and structure.</p> |
| <i>What: Procedures</i>     | In session 1 the nurse will work through Power-Point slides with the participant to introduce the rationale for SRT alongside a review of (baseline) sleep diaries, selection of bed and rise-times (for the following seven nights), management of daytime sleepiness (including implications for driving), and discussion of barriers/facilitators to implementation. Participants will be provided with diaries and sleep efficiency calculation grids to support implementation of SRT instructions and permit weekly review of progress. Sessions 2, 3 and 4 will be brief sessions to review progress, trouble-shoot any difficulties and advise upon titration of the sleep schedule.                                                                                                                                                                                                                                                                                                                                                                                                                                                                                                                                                                                                                                                                                                                                                                                                       |
| <i>Who provided</i>         | Registered practice nurses in primary care and research nurses from clinical research networks will be trained to deliver SRT.                                                                                                                                                                                                                                                                                                                                                                                                                                                                                                                                                                                                                                                                                                                                                                                                                                                                                                                                                                                                                                                                                                                                                                                                                                                                                                                                                                     |
| <i>How provided</i>         | Intervention is delivered one-to-one, involving both face-to-face (sessions 1 and 3) and over the phone contacts (sessions 2 and 4).                                                                                                                                                                                                                                                                                                                                                                                                                                                                                                                                                                                                                                                                                                                                                                                                                                                                                                                                                                                                                                                                                                                                                                                                                                                                                                                                                               |
| <i>Where</i>                | The face-to-face sessions will take place in a consultation room within general practice.                                                                                                                                                                                                                                                                                                                                                                                                                                                                                                                                                                                                                                                                                                                                                                                                                                                                                                                                                                                                                                                                                                                                                                                                                                                                                                                                                                                                          |
| <i>When and how much</i>    | <p>Intervention will be delivered over four sessions. Duration and format of sessions is as follows:</p> <ul style="list-style-type: none"> <li>• session 1 (in-person, ~30 minutes)</li> <li>• session 2 (by phone, ~10 minutes)</li> <li>• session 3 (in-person, ~15 minutes)</li> <li>• session 4 (by phone, ~10 minutes).</li> </ul>                                                                                                                                                                                                                                                                                                                                                                                                                                                                                                                                                                                                                                                                                                                                                                                                                                                                                                                                                                                                                                                                                                                                                           |

1  
2  
3  
4  
5  
6  
7  
8  
9  
10  
11  
12  
13  
14  
15  
16  
17  
18  
19  
20  
21  
22  
23  
24  
25  
26  
27  
28  
29  
30  
31  
32  
33  
34  
35  
36  
37  
38  
39  
40  
41  
42  
43  
44  
45  
46  
47  
48  
49  
50  
51  
52  
53  
54  
55  
56  
57  
58  
59  
60

| <i>Tailoring</i>                                                                           | <p>The treatment will be tailored to each individual’s sleep pattern but follows standardised instructions for setting and titrating time in bed (TIB):</p> <table border="1" data-bbox="475 297 1369 813"> <thead> <tr> <th data-bbox="475 297 730 338">Criterion</th> <th data-bbox="738 297 1369 338">SRT</th> </tr> </thead> <tbody> <tr> <td data-bbox="475 349 730 443">Calculation of prescribed time in bed (TIB)</td> <td data-bbox="738 349 1369 443">Based on average total sleep time (TST) from baseline 7-day sleep diary. Minimum TIB = 5 hrs.</td> </tr> <tr> <td data-bbox="475 454 730 517">Rise time selection</td> <td data-bbox="738 454 1369 517">Time that aligns with working schedule and can be adhered to 7 days a week</td> </tr> <tr> <td data-bbox="475 528 730 568">Bed time selection</td> <td data-bbox="738 528 1369 568">Typically delayed in order to equal the prescribed TIB.</td> </tr> <tr> <td data-bbox="475 580 730 763">Weekly adjustments to TIB based on average sleep efficiency for 7 days (SE) (sessions 2-4)</td> <td data-bbox="738 580 1369 763">                     a) SE <math>\geq</math> 85% increase TIB by 15 minutes<br/>                     b) SE = 80-84% no change to TIB<br/>                     c) SE <math>\leq</math> 79% decrease TIB by 15 minutes<br/><br/>                     Adjustments (advancing or delaying) are typically made to the prescribed bed-time.                 </td> </tr> <tr> <td data-bbox="475 775 730 813">Napping</td> <td data-bbox="738 775 1369 813">Recommendation to eliminate all napping</td> </tr> </tbody> </table> <p>The nurse will be encouraged to adapt the TIB prescription in the following circumstances: patient is struggling to adhere, or cannot tolerate the restriction; patient is excessively sleepy; or change in health precludes full implementation. In these circumstances nurses will be encouraged to agree a revised time in bed (increasing in 15 minute blocks) until the patient is content.</p> <p>On completion of nurse sessions participants are encouraged to continue self-implementing SRT on their own according to the standardised rules. Participants are provided with sleep diaries and grids to enable self-implementation at home. Once daytime functioning has improved and sleep efficiency remains high – and no further sleep is obtained with additional TIB – the participant has reached their optimal sleep schedule.</p> | Criterion | SRT | Calculation of prescribed time in bed (TIB) | Based on average total sleep time (TST) from baseline 7-day sleep diary. Minimum TIB = 5 hrs. | Rise time selection | Time that aligns with working schedule and can be adhered to 7 days a week | Bed time selection | Typically delayed in order to equal the prescribed TIB. | Weekly adjustments to TIB based on average sleep efficiency for 7 days (SE) (sessions 2-4) | a) SE $\geq$ 85% increase TIB by 15 minutes<br>b) SE = 80-84% no change to TIB<br>c) SE $\leq$ 79% decrease TIB by 15 minutes<br><br>Adjustments (advancing or delaying) are typically made to the prescribed bed-time. | Napping | Recommendation to eliminate all napping |
|--------------------------------------------------------------------------------------------|----------------------------------------------------------------------------------------------------------------------------------------------------------------------------------------------------------------------------------------------------------------------------------------------------------------------------------------------------------------------------------------------------------------------------------------------------------------------------------------------------------------------------------------------------------------------------------------------------------------------------------------------------------------------------------------------------------------------------------------------------------------------------------------------------------------------------------------------------------------------------------------------------------------------------------------------------------------------------------------------------------------------------------------------------------------------------------------------------------------------------------------------------------------------------------------------------------------------------------------------------------------------------------------------------------------------------------------------------------------------------------------------------------------------------------------------------------------------------------------------------------------------------------------------------------------------------------------------------------------------------------------------------------------------------------------------------------------------------------------------------------------------------------------------------------------------------------------------------------------------------------------------------------------------------------------------------------------------------------------------------------------------------------------------------------------------------------------------------------------------------------------------------------------------------------------------------------------------------------------------------------------------------------------------------------------------------------------------------------------------------------------------------------------------------------------------------------------------------------------|-----------|-----|---------------------------------------------|-----------------------------------------------------------------------------------------------|---------------------|----------------------------------------------------------------------------|--------------------|---------------------------------------------------------|--------------------------------------------------------------------------------------------|-------------------------------------------------------------------------------------------------------------------------------------------------------------------------------------------------------------------------|---------|-----------------------------------------|
| Criterion                                                                                  | SRT                                                                                                                                                                                                                                                                                                                                                                                                                                                                                                                                                                                                                                                                                                                                                                                                                                                                                                                                                                                                                                                                                                                                                                                                                                                                                                                                                                                                                                                                                                                                                                                                                                                                                                                                                                                                                                                                                                                                                                                                                                                                                                                                                                                                                                                                                                                                                                                                                                                                                    |           |     |                                             |                                                                                               |                     |                                                                            |                    |                                                         |                                                                                            |                                                                                                                                                                                                                         |         |                                         |
| Calculation of prescribed time in bed (TIB)                                                | Based on average total sleep time (TST) from baseline 7-day sleep diary. Minimum TIB = 5 hrs.                                                                                                                                                                                                                                                                                                                                                                                                                                                                                                                                                                                                                                                                                                                                                                                                                                                                                                                                                                                                                                                                                                                                                                                                                                                                                                                                                                                                                                                                                                                                                                                                                                                                                                                                                                                                                                                                                                                                                                                                                                                                                                                                                                                                                                                                                                                                                                                          |           |     |                                             |                                                                                               |                     |                                                                            |                    |                                                         |                                                                                            |                                                                                                                                                                                                                         |         |                                         |
| Rise time selection                                                                        | Time that aligns with working schedule and can be adhered to 7 days a week                                                                                                                                                                                                                                                                                                                                                                                                                                                                                                                                                                                                                                                                                                                                                                                                                                                                                                                                                                                                                                                                                                                                                                                                                                                                                                                                                                                                                                                                                                                                                                                                                                                                                                                                                                                                                                                                                                                                                                                                                                                                                                                                                                                                                                                                                                                                                                                                             |           |     |                                             |                                                                                               |                     |                                                                            |                    |                                                         |                                                                                            |                                                                                                                                                                                                                         |         |                                         |
| Bed time selection                                                                         | Typically delayed in order to equal the prescribed TIB.                                                                                                                                                                                                                                                                                                                                                                                                                                                                                                                                                                                                                                                                                                                                                                                                                                                                                                                                                                                                                                                                                                                                                                                                                                                                                                                                                                                                                                                                                                                                                                                                                                                                                                                                                                                                                                                                                                                                                                                                                                                                                                                                                                                                                                                                                                                                                                                                                                |           |     |                                             |                                                                                               |                     |                                                                            |                    |                                                         |                                                                                            |                                                                                                                                                                                                                         |         |                                         |
| Weekly adjustments to TIB based on average sleep efficiency for 7 days (SE) (sessions 2-4) | a) SE $\geq$ 85% increase TIB by 15 minutes<br>b) SE = 80-84% no change to TIB<br>c) SE $\leq$ 79% decrease TIB by 15 minutes<br><br>Adjustments (advancing or delaying) are typically made to the prescribed bed-time.                                                                                                                                                                                                                                                                                                                                                                                                                                                                                                                                                                                                                                                                                                                                                                                                                                                                                                                                                                                                                                                                                                                                                                                                                                                                                                                                                                                                                                                                                                                                                                                                                                                                                                                                                                                                                                                                                                                                                                                                                                                                                                                                                                                                                                                                |           |     |                                             |                                                                                               |                     |                                                                            |                    |                                                         |                                                                                            |                                                                                                                                                                                                                         |         |                                         |
| Napping                                                                                    | Recommendation to eliminate all napping                                                                                                                                                                                                                                                                                                                                                                                                                                                                                                                                                                                                                                                                                                                                                                                                                                                                                                                                                                                                                                                                                                                                                                                                                                                                                                                                                                                                                                                                                                                                                                                                                                                                                                                                                                                                                                                                                                                                                                                                                                                                                                                                                                                                                                                                                                                                                                                                                                                |           |     |                                             |                                                                                               |                     |                                                                            |                    |                                                         |                                                                                            |                                                                                                                                                                                                                         |         |                                         |
| <i>How well</i>                                                                            | <p>Face-to-face sessions are audio-recorded and independently appraised for fidelity by a Clinical Psychologist experienced in cognitive behavioural therapy for insomnia. Nurses follow and ‘sign-off’ a checklist at the end of each session in order to capture duration of session and adherence to treatment instructions.</p>                                                                                                                                                                                                                                                                                                                                                                                                                                                                                                                                                                                                                                                                                                                                                                                                                                                                                                                                                                                                                                                                                                                                                                                                                                                                                                                                                                                                                                                                                                                                                                                                                                                                                                                                                                                                                                                                                                                                                                                                                                                                                                                                                    |           |     |                                             |                                                                                               |                     |                                                                            |                    |                                                         |                                                                                            |                                                                                                                                                                                                                         |         |                                         |

# BMJ Open

**Primary care treatment of insomnia: study protocol for a pragmatic, multicentre, randomised controlled trial comparing nurse-delivered sleep restriction therapy to sleep hygiene (the HABIT trial)**

|                                 |                                                                                                                                                                                                                                                                                                                                                                                                                                                                                                                                                                                                                                                                                                                                                                                                                   |
|---------------------------------|-------------------------------------------------------------------------------------------------------------------------------------------------------------------------------------------------------------------------------------------------------------------------------------------------------------------------------------------------------------------------------------------------------------------------------------------------------------------------------------------------------------------------------------------------------------------------------------------------------------------------------------------------------------------------------------------------------------------------------------------------------------------------------------------------------------------|
| Journal:                        | <i>BMJ Open</i>                                                                                                                                                                                                                                                                                                                                                                                                                                                                                                                                                                                                                                                                                                                                                                                                   |
| Manuscript ID                   | bmjopen-2019-036248.R1                                                                                                                                                                                                                                                                                                                                                                                                                                                                                                                                                                                                                                                                                                                                                                                            |
| Article Type:                   | Protocol                                                                                                                                                                                                                                                                                                                                                                                                                                                                                                                                                                                                                                                                                                                                                                                                          |
| Date Submitted by the Author:   | 29-Jan-2020                                                                                                                                                                                                                                                                                                                                                                                                                                                                                                                                                                                                                                                                                                                                                                                                       |
| Complete List of Authors:       | Kyle, Simon; University of Oxford, Sleep and Circadian Neuroscience Institute<br>Madigan, Claire; University of Oxford, Nuffield Department of Primary Care Health Sciences<br>Begum, Nargis; Nuffield Department of Primary Care Health Sciences<br>Abel, Lucy; University of Oxford<br>Armstrong, S; Community and Health Research Unit, College of Social Science, University of Lincoln, Lincoln, UK, School of Health and Social Care<br>Aveyard, Paul; University of Oxford, Primary Care Health Sciences<br>Bower, Peter; University of Manchester, NPCRDC<br>Ogburn, Emma; University of Oxford,<br>Siriwardena, Aloysius; University of Lincoln, School of Health and Social Care<br>Yu, Ly-Mee; University of Oxford, Department of Primary Care Health Sciences<br>Espie, Colin; University of Oxford, |
| <b>Primary Subject Heading</b>: | Mental health                                                                                                                                                                                                                                                                                                                                                                                                                                                                                                                                                                                                                                                                                                                                                                                                     |
| Secondary Subject Heading:      | Mental health                                                                                                                                                                                                                                                                                                                                                                                                                                                                                                                                                                                                                                                                                                                                                                                                     |
| Keywords:                       | SLEEP MEDICINE, Adult psychiatry < PSYCHIATRY, PRIMARY CARE                                                                                                                                                                                                                                                                                                                                                                                                                                                                                                                                                                                                                                                                                                                                                       |
|                                 |                                                                                                                                                                                                                                                                                                                                                                                                                                                                                                                                                                                                                                                                                                                                                                                                                   |

SCHOLARONE™  
Manuscripts



I, the Submitting Author has the right to grant and does grant on behalf of all authors of the Work (as defined in the below author licence), an exclusive licence and/or a non-exclusive licence for contributions from authors who are: i) UK Crown employees; ii) where BMJ has agreed a CC-BY licence shall apply, and/or iii) in accordance with the terms applicable for US Federal Government officers or employees acting as part of their official duties; on a worldwide, perpetual, irrevocable, royalty-free basis to BMJ Publishing Group Ltd ("BMJ") its licensees and where the relevant Journal is co-owned by BMJ to the co-owners of the Journal, to publish the Work in this journal and any other BMJ products and to exploit all rights, as set out in our [licence](#).

The Submitting Author accepts and understands that any supply made under these terms is made by BMJ to the Submitting Author unless you are acting as an employee on behalf of your employer or a postgraduate student of an affiliated institution which is paying any applicable article publishing charge ("APC") for Open Access articles. Where the Submitting Author wishes to make the Work available on an Open Access basis (and intends to pay the relevant APC), the terms of reuse of such Open Access shall be governed by a Creative Commons licence – details of these licences and which [Creative Commons](#) licence will apply to this Work are set out in our licence referred to above.

Other than as permitted in any relevant BMJ Author's Self Archiving Policies, I confirm this Work has not been accepted for publication elsewhere, is not being considered for publication elsewhere and does not duplicate material already published. I confirm all authors consent to publication of this Work and authorise the granting of this licence.



1  
2  
3 **Primary care treatment of insomnia: study protocol for a pragmatic,**  
4 **multicentre, randomised controlled trial comparing nurse-delivered sleep**  
5 **restriction therapy to sleep hygiene (the HABIT trial)**  
6  
7  
8  
9

10  
11  
12  
13  
14  
15 Simon D. Kyle<sup>1</sup>, Claire D. Madigan<sup>2</sup>, Nargis Begum<sup>2</sup>, Lucy Abel<sup>2</sup>, Stephanie Armstrong<sup>3</sup>, Paul  
16 Aveyard<sup>2</sup>, Peter Bower<sup>4</sup>, Emma Ogburn<sup>2</sup>, Aloysius Siriwardena<sup>3</sup>, Ly-Mee Yu<sup>2</sup>, Colin A. Espie<sup>1</sup>  
17  
18

19  
20  
21 <sup>1</sup>Sleep and Circadian Neuroscience Institute, Nuffield Department of Clinical Neurosciences,  
22 Sir William Dunn School of Pathology, University of Oxford, South Parks Road, Oxford, OX1  
23 3RE.  
24  
25

26  
27  
28 <sup>2</sup>Nuffield Department of Primary Care Health Sciences, University of Oxford, Radcliffe  
29 Observatory Quarter, Oxford, OX2 6GG.  
30  
31

32  
33  
34 <sup>3</sup>School of Health and Social Care, University of Lincoln, Lincoln, LN5 7AT.  
35

36 <sup>4</sup>NIHR School for Primary Care Research, Centre for Primary Care and Health Services  
37 Research, Manchester Academic Health Science Centre, University of Manchester,  
38 Williamson Building, Manchester, M13 9PL.  
39  
40  
41  
42  
43  
44  
45  
46

47 *Correspondence to:*  
48

49 Simon D. Kyle, PhD  
50

51  
52 Sleep and Circadian Neuroscience Institute,  
53 Nuffield Department of Clinical Neurosciences, University of Oxford  
54 Dunn School of Pathology, South Parks Road,  
55 Oxford, OX1 3RE  
56 [simon.kyle@ndcn.ox.ac.uk](mailto:simon.kyle@ndcn.ox.ac.uk)  
57

58 **Abstract**  
59  
60

1  
2  
3 **Introduction:** Insomnia is a prevalent sleep disorder that negatively affects quality of life.  
4  
5 Multicomponent cognitive-behavioural therapy (CBT) is the recommended treatment but  
6  
7 access remains limited, particularly in primary care. Sleep restriction therapy (SRT) is one of  
8  
9 the principal active components of CBT and could be delivered by generalist staff in primary  
10  
11 care. The aim of this randomised controlled trial is to establish whether nurse-delivered SRT  
12  
13 for insomnia disorder is clinically and cost-effective compared to sleep hygiene advice.  
14  
15

16  
17  
18 **Methods and Analysis:** In the HABIT trial, 588 participants meeting criteria for insomnia  
19  
20 disorder will be recruited from primary care in England and randomised (1:1) to either nurse-  
21  
22 delivered SRT (plus sleep hygiene booklet) or sleep hygiene booklet on its own. SRT will be  
23  
24 delivered over four weekly sessions; total therapy time is approximately 1 hour. Outcomes will  
25  
26 be collected at baseline, 3, 6 and 12 months post-randomisation. The primary outcome is self-  
27  
28 reported insomnia severity using the insomnia severity index (ISI) at six months. Secondary  
29  
30 outcomes include health-related and sleep-related quality of life, depressive symptoms, use of  
31  
32 prescribed sleep medication, diary and actigraphy-recorded sleep parameters, and work  
33  
34 productivity. Analyses will be intention to treat. Moderation and mediation analyses will be  
35  
36 conducted and a cost-utility analysis and process evaluation will be performed.  
37  
38  
39

40  
41 **Ethics and dissemination:** Ethical approval was granted by the Yorkshire & the Humber -  
42  
43 Bradford Leeds Research Ethics Committee (reference: 18/YH/0153). We will publish our  
44  
45 primary findings (on clinical and cost-effectiveness) in high-impact, peer-reviewed journals.  
46  
47 There will be further outputs in relation to process evaluation and secondary analyses focused  
48  
49 on moderation and mediation. Trial results could make the case for the introduction of nurse-  
50  
51 delivered sleep therapy in primary care, increasing access to evidence-based treatment for  
52  
53 people with insomnia disorder.  
54  
55  
56

57  
58  
59 **Trial registration:** ISRCTN42499563  
60

1  
2  
3 **Key words:** Insomnia disorder; sleep restriction therapy; primary care.  
4  
5

6 **Strengths and Limitations of this study**  
7  
8

- 9
- 10 • This multi-centre RCT will recruit 588 participants and will be the largest trial of sleep  
11 restriction therapy (SRT) for insomnia.  
12
  - 13 • This study will test whether brief, nurse-delivered SRT in primary care is clinically and  
14 cost-effective.  
15
  - 16 • The control group will be provided with a sleep hygiene booklet while the SRT arm  
17 will receive both nurse-delivered SRT and a sleep hygiene booklet  
18
  - 19 • The primary outcome is self-reported insomnia severity while secondary outcomes  
20 include actigraphy-defined sleep, use of sleep medication, quality of life and depressive  
21 symptoms.  
22
  - 23 • Owing to the nature of the intervention participants will not be blind to treatment  
24 allocation.  
25  
26  
27  
28  
29  
30  
31  
32  
33  
34  
35  
36  
37  
38  
39  
40  
41  
42  
43  
44  
45  
46  
47  
48  
49  
50  
51  
52  
53

54 **Introduction**  
55

56  
57  
58 Insomnia disorder is characterised by persistent problems with sleep initiation and  
59 maintenance, significantly impairing quality of life (1-3). Persistent insomnia affects  
60

1  
2  
3 approximately 10% of the adult population (4) and is a risk factor for several mental and  
4  
5 physical health problems, particularly depression and cardiometabolic disease (5,6). Insomnia  
6  
7 is also an expensive condition, associated with substantial direct and indirect costs; chiefly  
8  
9 reflecting increased healthcare utilisation, work-related absenteeism, reduced work  
10  
11 productivity and elevated accident risk (7-9).  
12  
13  
14

15  
16 Insomnia is treatable. The principal treatment options are hypnotic medication and cognitive  
17  
18 behavioural therapy (CBT). The former is indicated for short-term use only, while the latter is  
19  
20 the recommended first-line treatment and has been shown to engender sustained improvement  
21  
22 in self-reported sleep and insomnia severity (10). Despite national and international clinical  
23  
24 guidelines recommending CBT (11-13), access is almost non-existent in routine care across  
25  
26 many health systems. In the absence of available treatment, general practitioners (GPs) are  
27  
28 limited to administering sleep hygiene guidelines, hypnotics, and (off-label) sedative  
29  
30 antidepressants (14-15); yet none are evidence-based for persistent insomnia (12;16), and  
31  
32 hypnotics have well-defined side-effects (4). Barriers to wide-scale adoption of CBT for  
33  
34 insomnia in routine healthcare relate to limited training, expertise and funding. A major  
35  
36 development in the insomnia field, therefore, has been the dismantling of multicomponent,  
37  
38 multisession CBT into brief and focussed treatment packages (17), and the training of non-  
39  
40 specialists to deliver such therapies (18-20).  
41  
42  
43  
44  
45  
46  
47  
48  
49

50  
51 SRT has emerged as one of the primary active ingredients within multi-component CBT. The  
52  
53 therapy involves restricting and standardising a patient's time in bed with the aim of increasing  
54  
55 homeostatic sleep pressure, over-riding cognitive and physiological arousal, and  
56  
57 strengthening circadian regulation of sleep (21). Tailored prescription of bed and rise-times  
58  
59 over several weeks leads to improved sleep consolidation and reduction in insomnia severity.  
60

1  
2  
3 Its short length and simplicity renders SRT ideally suited for delivery by generalist staff in  
4  
5 primary care.  
6  
7

8  
9 A systematic review of trials comparing single-component SRT to waitlist control or sleep  
10  
11 hygiene advice found medium-to-large effects on sleep continuity measures (22). Moreover,  
12  
13 recent trials suggest SRT may be as effective as multicomponent CBT (23-24). One primary  
14  
15 care trial compared brief SRT delivered by one GP with sleep hygiene advice (25). The  
16  
17 participants were highly selected so that they were free from comorbidity or medication use.  
18  
19 SRT significantly reduced insomnia severity at 6 months (Cohen's  $d=0.54$ ). While this was an  
20  
21 important first study, a pragmatic trial in primary care testing a scalable model of treatment  
22  
23 delivery is clearly required.  
24  
25  
26

27  
28 We have developed a brief SRT protocol based upon 1) our extensive research using  
29  
30 multicomponent CBT (18-20) and 2) systematic examination of the patient experience of SRT  
31  
32 (26). We aim to test whether brief SRT (alongside sleep hygiene advice) is both clinically and  
33  
34 cost-effective, relative to sleep hygiene advice on its own. We have chosen practice nurses  
35  
36 instead of GPs based on previous successful trial experience with this professional group (18-  
37  
38 20) and with cost-effectiveness and scalability in mind. Practice nurses are increasingly  
39  
40 involved in chronic disease management (where sleep disturbance is a common comorbidity)  
41  
42 and the delivery of brief behavioural interventions in primary care (27). While previous studies  
43  
44 in UK primary care show multicomponent CBT to be effective when delivered by nurses  
45  
46 (18,19), counsellors (28), or through self-help CBT booklets (29), there has been no large-scale  
47  
48 evaluation of the clinical and cost-effectiveness of a brief and scalable behavioural  
49  
50 intervention.  
51  
52  
53

### 54 55 56 *Study Objectives* 57 58 59 60

1  
2  
3 The primary objective of the Health-professional Administered Brief Insomnia Therapy  
4 (HABIT) trial is to establish whether nurse-delivered SRT(+sleep hygiene [SH]) for insomnia  
5 disorder in primary care improves insomnia more than SH alone. We hypothesise that  
6 participants allocated to SRT(+SH) will demonstrate lower insomnia severity at 6 months post-  
7 randomisation compared with those allocated to SH alone.  
8  
9

10  
11  
12  
13  
14  
15 Our secondary hypotheses are as follow:  
16

- 17  
18  
19 1. Compared to SH, participants allocated to SRT(+SH) will report improvements in  
20 health-related quality of life, sleep-related quality of life, depressive symptoms, work  
21 productivity, pre-sleep arousal and sleep effort (at 3, 6 and 12 months).  
22  
23
- 24  
25 2. Compared to SH, participants allocated to SRT(+SH) will demonstrate improvements  
26 in sleep parameters (diary and actigraphy-recorded) and report a reduction in use of  
27 sleep-promoting medication (6 and 12 months)  
28  
29
- 30  
31 3. The effect of SRT(+SH) on insomnia severity will be mediated via reduction in sleep  
32 effort and pre-sleep arousal, consistent with theoretical models (21)  
33  
34  
35  
36  
37

38 Other objectives:  
39

- 40  
41 4. To establish whether nurse-delivered SRT(+SH) for insomnia disorder in primary care  
42 is cost-effective compared to SH, from NHS and societal perspectives.  
43  
44
- 45  
46 5. To undertake a process evaluation to understand intervention delivery, fidelity and  
47 acceptability.  
48  
49
- 50  
51 6. To test whether insomnia phenotype moderates clinical benefit obtained from  
52 SRT(+SH). One prominent model posits that participants with objective short sleep  
53 duration are less likely to experience improvement in insomnia relative to those with  
54 normal sleep duration (5). We will examine whether actigraphy-defined sleep duration  
55  
56  
57  
58  
59  
60

( $< 6$ hrs vs.  $\geq 6$ hrs) at baseline moderates the effect of SRT on clinical outcomes (at 6 months)

7. To test whether SRT adherence mediates degree of clinical change (ISI) from baseline to 3 months, and from baseline to 6 months.

## Methods and Analysis

### Trial design

This is a pragmatic, multicentre, individually randomised, parallel group, superiority trial to test whether nurse-delivered SRT(+SH), compared to SH alone, reduces insomnia severity. Both groups will receive treatment as usual without restriction. Participants will be recruited from general practices across three regions in the UK (Thames Valley, Greater Manchester and Lincolnshire). Assessments will take place at baseline, 3, 6 and 12 months post-randomisation (see Figure 1 for trial flow). The trial is prospectively registered with the ISRCTN (ISRCTN42499563). There is a Trial Steering Committee and Data Monitoring and Ethics Committee, both comprised of majority independent members.

[INSERT Figure 1]

### Participants and recruitment

We aim to recruit participants aged 18 years and above in primary care practices who meet criteria for insomnia disorder. Since insomnia is not commonly coded within practice records we will search records for broad sleep-related terms, sleep-related medications and associated conditions to identify those most likely to be eligible, while applying exclusionary diagnoses. We will send invitations to identified individuals. We will also identify potential participants through a) direct face-to-face GP referral (participants will be provided with an information

1  
2  
3 sheet and contact details for the research team); b) placing posters in practices (containing study  
4 contact details) and c) posting study adverts on the internet (e.g., practice websites, Facebook).  
5  
6  
7

8 Participants will be screened for eligibility over the phone by the research team, or through  
9 self-completion of an online questionnaire. The inclusion criteria are as follows: a) participant  
10 is willing and able to give informed consent for participation; b) screen positive for insomnia  
11 symptoms on the Sleep Condition Indicator (SCI; 30) and meet DSM-5 criteria for insomnia  
12 disorder; c) self-reported sleep efficiency < 85% over the past month; d) age  $\geq 18$  years; and e)  
13 able to attend appointments during baseline and 4-week intervention (both face-to-face at the  
14 practice and over the phone) and adhere to study procedures.  
15  
16  
17  
18  
19  
20  
21  
22  
23

24 Exclusions will be limited principally to conditions which may be contraindicated for SRT, or  
25 render SRT inappropriate or ineffective: a) pregnant/pregnancy planning in the next 6 months;  
26 b) additional sleep disorder diagnosis (e.g., restless legs syndrome, obstructive sleep apnoea,  
27 narcolepsy) or “positive” screen on screening questionnaire (31); c) dementia or mild cognitive  
28 impairment; d) diagnosis of epilepsy, schizophrenia or bipolar disorder; e) current suicidal  
29 ideation with intent (32) or attempted suicide within past 2 months; f) currently receiving  
30 cancer treatment or planned major surgery during treatment phase; g) night, evening, early  
31 morning or rotating shift-work; h) currently receiving psychological treatment for insomnia  
32 from a health professional or taking part in an online treatment programme for insomnia; and  
33 i) life expectancy of <2 years. On completion of screening, eligible participants will be invited  
34 to a baseline appointment with a member of the research team where they will provide written  
35 informed consent (see *appendices*), complete baseline questionnaires (see *assessments* section)  
36 and asked to complete a sleep diary and wear an actigraph watch for the following week.  
37  
38  
39  
40  
41  
42  
43  
44  
45  
46  
47  
48  
49  
50  
51  
52  
53  
54  
55  
56  
57  
58  
59  
60

Participants will return the completed diary and actigraph watch to the research team via postal mail.



## Interventions

### Sleep hygiene (SH)

Usual care for persistent insomnia typically involves sleep hygiene advice, repeat hypnotic prescription, and use of sedative antidepressants or antihistamines (14,15). For those aged 55+ years, melatonin may also be prescribed for insomnia, consistent with English guidelines from the National Institute for Health and Care Excellence (NICE; 13). Evidence shows that access to and awareness of CBT for insomnia in primary care is very limited (14).

Since NICE recommends that individuals with persistent insomnia should receive sleep hygiene advice, it is likely that some participants will have been exposed to such information in the past. Therefore, to avoid bias, all participants in both arms will be provided with the same standardised sleep hygiene information. We will provide a booklet comprising standard behavioural guidance about lifestyle and environmental factors associated with sleep and sleeplessness (33). Participants randomised to the SH arm will be sent their booklet via email or post.

Consistent with the requirements of a pragmatic trial, there will be no restrictions upon usual care for both groups. In this way, the trial represents a comparison of SRT+SH (+treatment as usual, TAU) vs. SH (+TAU), permitting clear judgment to be made regarding the relative clinical utility of SRT in routine clinical practice.

### Sleep restriction therapy (SRT)

Participants in the intervention arm will be offered nurse-delivered insomnia therapy in the form of SRT, a manualised behavioural intervention. See *Supplementary Table 1* for a detailed description of the intervention according to the template for intervention description and replication (TIDieR) checklist (34). We will initially aim to train practice nurses to deliver SRT

1  
2  
3 but in order to overcome scheduling issues that may arise, or limitations on practice capacity,  
4 we will also train research nurses from clinical research networks to support delivery. Nurses  
5 will receive a four-hour training session on insomnia and the delivery of SRT as well as access  
6 to supporting resources (e.g. recorded video clips and a list of frequently asked questions and  
7 answers in relation to treatment delivery). Trained nurses will deliver manualised SRT over  
8 four brief, weekly sessions [total contact time = approximately 1hr 5 mins]. In session 1 the  
9 nurse will work through slides with the participant to introduce the rationale for SRT alongside  
10 a review of sleep diaries, selection of bed and rise-times, management of daytime sleepiness  
11 (including implications for driving), and discussion of barriers/facilitators to implementation.  
12 Participants will also be provided with a booklet to read in their own time, which includes  
13 information on theory underlying SRT and a list of sleep hygiene guidelines (identical to those  
14 provided to the control arm). Participants will be provided with diaries and sleep efficiency  
15 calculation grids to support implementation of SRT instructions and permit weekly review of  
16 progress. Sessions 2, 3 and 4 will be brief sessions (10-15 minutes) to review progress, trouble-  
17 shoot any difficulties and advise upon adaptation of the sleep schedule (35). Sessions 1 and 3  
18 will be in-person at the practice while sessions 2 and 4 will be over the phone.

### 40 **Randomisation and blinding**

41  
42 Following completion of baseline assessments participants will be randomised (1:1) to  
43 SRT+SH or SH using a fully validated web-based randomisation program (Sortition), with a  
44 non-deterministic minimisation algorithm to balance region (Thames Valley, Lincolnshire,  
45 Greater Manchester), use of prescribed sleep promoting medication (yes/no), age (18-65 yrs vs  
46 > 65yrs), sex, baseline insomnia severity (ISI [36] score <22 vs. 22-28) and depression  
47 symptom severity (PHQ-9 [37] score <10 vs. 10-27) across the two groups. Members of the  
48 research team will inform participants of their allocation.

1  
2  
3 This is an open-label study and therefore both participants and nurses will be aware of  
4 allocation. The participant information sheet will inform participants that the study compares  
5 two different sleep intervention programmes but will not reveal the study hypothesis.  
6  
7 Treatment providers (nurses) will not be involved in the collection of trial outcomes. Outcomes  
8 (questionnaires, diaries and actigraphy) are self-completed, remotely, by participants. It will be  
9 impractical to blind the research team. The statisticians will remain blind to group allocation.  
10  
11  
12  
13  
14  
15  
16

### 17 **Assessments**

18  
19  
20 The primary outcome is insomnia severity assessed by the insomnia severity index (ISI; 36),  
21 and will be measured at baseline, 3, 6, and 12 months post-randomisation. Secondary outcomes  
22 will similarly be measured at all four time-points and they are health-related quality of life (SF-  
23 36; 38), sleep-related quality of life (GSII; 3), depressive symptoms (PHQ-9; 37), work  
24 productivity and activity impairment (WPAI; 39), sleep effort (GSES; 40) and pre-sleep arousal  
25 (PSAS; 41). Questionnaires will be completed online or on paper, depending on participant  
26 preference. Self-reported sleep and use of sleep medication will be captured over 7 days using  
27 the consensus sleep diary (42) collected at baseline, 6 and 12 months. The consensus sleep  
28 diary will also be completed by the SRT group during the 4-week intervention phase.  
29 Actigraphy-defined sleep (CamNtech Ltd., MotionWatch 8) will be measured at baseline, 6  
30 and 12 months. A modified version of the client service receipt inventory (CSRI; 43) and the  
31 EQ-5D-3L (44) will be administered at baseline, 3, 6 and 12 months to inform the cost-  
32 effectiveness evaluation. Participants will receive vouchers for completion of outcomes at each  
33 assessment point [vouchers = £5 at baseline, £10 at 3 months, £15 at 6 months and £10 at 12  
34 months]. A summary of outcomes in relation to study objectives can be found in Table 1.  
35  
36  
37  
38  
39  
40  
41  
42  
43  
44  
45  
46  
47  
48  
49  
50  
51  
52  
53  
54

55 [INSERT Table 1]  
56  
57  
58  
59  
60

## Process evaluation

Consistent with MRC guidance for trials of complex interventions we will conduct a process evaluation (45). The aim of the process evaluation is to explore nurse-delivered SRT in the primary care setting by examining implementation, mechanisms of impact, and contextual factors that facilitate or impede intervention delivery. This will complement the outcomes evaluation, helping to understand the trial results through exploring:

- (i) nurse perceptions of SRT, including training and support
- (ii) fidelity of intervention delivery by nurses
- (iii) whether participants in the control group also receive SRT (i.e. contamination)
- (iv) the participant experience of SRT, including reflections on implementing the sleep schedule and perceptions of benefit, as well as any unexpected consequences
- (v) whether level of adherence mediates degree of clinical improvement
- (vi) views of primary care staff in relation to the implementation of SRT beyond the context of the trial.

In order to capture experiences and perceptions of SRT semi-structured interviews will be conducted by the research team with a sample of practice nurses (n=15), trial participants (n=15) and practice managers or GPs (n=15) across the three study sites. Interview participants will be invited from 5 practices from each of the three trial recruitment centres. The practices will be selected to reflect a range of practice types (e.g., based on practice size, or membership of a consortium) and, for each selected practice, one nurse, one trial participant and one GP or practice manager will be interviewed. These will be in-depth semi-structured telephone, *Skype* or face-to-face interviews lasting 30-60 minutes using separate interview schedules for each group. Consent process and interviews will be digitally audio recorded and transcribed verbatim. Professionals will be asked about their working role in relation to delivering the SRT intervention. Participant

1  
2  
3 interviews will take place after the intervention phase. Participants will receive a £10 voucher  
4  
5 for interview participation.  
6  
7  
8  
9

10  
11 To enable fidelity assessment, all in-person SRT sessions will be recorded (if participants  
12 consent). A sample of these sessions will be rated by a trained member of the research team  
13 using a bespoke rating scale. We will monitor potential for control group contamination (i.e.  
14 SH participants accessing SRT via the trained practice nurse) through questionnaire (43)  
15 completion at 3 and 6 months follow-up. SRT engagement will be measured with respect to  
16 number of treatment sessions attended, while adherence to therapeutic instructions (prescribed  
17 bed and rise-times) will be quantified from sleep diaries recorded during the 4-week  
18 intervention phase.  
19  
20  
21  
22  
23  
24  
25  
26  
27  
28  
29

### 30 **Sample size**

31  
32 To detect a difference on the ISI of 1.35 points (standard deviation=4.50) between the group  
33 means of SRT+SH and SH, with a power of 90% at 5% level of significance (2-sided), 235  
34 participants would be required in each treatment group. This equates to a standardised effect  
35 size of 0.3. The standard deviation was based on the results from the primary care evaluation  
36 of SRT conducted by Falloon and colleagues (25). Accounting for 20% attrition the total  
37 number of participants required to be recruited is 588 (294 per group). Should attrition be  
38 higher, at 25% or 30%, the total number of participants required would be 628 (314 per group)  
39 or 672 (336 per group), respectively.  
40  
41  
42  
43  
44  
45  
46  
47  
48  
49  
50

51  
52  
53  
54 Most CBT evaluations show large effects on the ISI (46) but these studies have small samples,  
55 are tightly controlled and recruit participants from the community, who are generally free from  
56 comorbidity or medication. Given that our study is a pragmatic trial, across multiple NHS sites,  
57  
58  
59  
60

1  
2  
3 with a varied group of insomnia patients (representing clinical reality), we would anticipate a  
4 lower effect size for the ISI. Falloon and colleagues (25) recruited a highly selected group of  
5 patients and delivered treatment via one research GP, observing an effect size of 0.54 at 6  
6 months on the ISI. Thus, powering the study for a moderate standardised effect size of 0.3 is  
7 conservative and appropriate given our design features. The sample size will also allow us to  
8 detect an average difference of 2.7 points [standard deviation=9.0 (47)] on the SF-36 (HRQoL),  
9 our important secondary outcome, at 90% power and 5% level of significance.

10  
11  
12 For the interviews we aim to recruit 15 participants, consistent with our previous experience of  
13 Framework analysis (48) and guidelines recommending that a minimum of 12 interviews are  
14 needed to achieve data saturation (49).

### 25 26 27 **Adverse events**

28  
29  
30 The likelihood of serious adverse events (SAEs) occurring due to treatment is low since neither  
31 CBT/SRT nor sleep hygiene advice have been reported to cause them. We define SAEs as any  
32 untoward medical occurrence that either: a) results in death; b) is life-threatening; c) requires  
33 inpatient hospitalisation or prolongation of existing hospitalisation; d) results in persistent or  
34 significant disability/incapacity; or d) consists of a congenital anomaly or birth defect.  
35  
36 Therapists and participants will be prompted to self-report SAEs. Along with self-reporting of  
37 SAEs, we will also use responses on the CSRI (43) - which includes questions on  
38 hospitalisations - to follow-up participants who report being hospitalised. We will record  
39 planned hospital admissions at baseline and, when they occur, these will not be counted as  
40 SAEs. SAEs will be assessed for severity, seriousness and relatedness to study procedures by  
41 a medically qualified member of the team. SAEs will be reported after date of randomisation  
42 until either the date of trial withdrawal or 6-month follow-up completion, whichever is earlier.  
43  
44  
45  
46  
47  
48  
49  
50  
51  
52  
53  
54  
55  
56  
57  
58  
59  
60

1  
2  
3 Because implementation of SRT may be associated with increased sleepiness we will also  
4 record falls, accidents (including road-traffic accidents and work-related injuries) and near-  
5 miss driving incidents alongside outcomes at baseline, 3, 6, and 12 months post-randomisation  
6 and report these by randomised group.  
7  
8  
9  
10  
11  
12

### 13 **Analysis Plan**

#### 14 *Statistical Analysis*

15  
16 The primary statistical analysis will be carried out on the basis of intention-to-treat (ITT). We  
17 will endeavour to obtain full follow-up data on every participant to allow full ITT analysis, but  
18 we will inevitably experience the problem of missing data due to withdrawal, loss to follow-  
19 up, or nonresponse to some questionnaire items. The results from the trial will be prepared as  
20 comparative summary statistics with 95% confidence intervals. All the tests will be performed  
21 at a 5% two-sided significance level. The study results will be reported in accordance with the  
22 Consolidated Standards of Reporting Trials (CONSORT) guidelines (50). A full detailed  
23 statistical analysis plan will be prepared and finalised before data collection is complete.  
24  
25  
26  
27  
28  
29  
30  
31  
32  
33  
34  
35  
36  
37  
38  
39  
40

41 A three-level mixed effect linear model based on an unstructured covariance matrix will be  
42 fitted to the primary outcome data (ISI at 6 months), utilising 3, 6 and 12-month time-points.  
43 Practice and participant will be included as random effects. Fixed effects will include  
44 randomised group, baseline ISI score, stratification variables, time and a time by randomised  
45 group interaction term to allow estimation of treatment effect at each time point.  
46  
47  
48  
49  
50  
51  
52  
53

54 Missing data will be reported (alongside reasons for missingness where available) and the  
55 missing data pattern will be explored, though the mixed effects model implicitly accounts for  
56 data missing at random. Standard residual diagnostics will be assessed for the appropriateness  
57  
58  
59  
60

1  
2  
3 of the model and if assumptions are violated we will consider alternative non-parametric  
4 approaches for the main analysis. Continuous secondary outcomes will be analysed using the  
5 same method. Secondary outcomes that are binary (e.g. zero hypnotic use over 7 days) or count  
6 variables (e.g. number of nights hypnotic-free over 7 nights) will be analysed using generalised  
7 linear mixed effect models with appropriate link function. We will undertake pre-specified sub-  
8 group analysis of the primary outcome by actigraphy-defined sleep duration at baseline (< 6hrs  
9 vs.  $\geq$  6hrs). Mediation analyses will be conducted using the approach of Baron and Kenny (51)  
10 but will follow the adaptation in Freeman et al (52) which makes use of linear mixed effects  
11 models. This will allow us to determine the extent to which the 3-month arousal outcomes  
12 (PSAS, GSES) mediate the 6-month ISI outcome. All models will include the baseline  
13 assessments of the mediator and ISI as covariates. A complier-average causal effect (CACE)  
14 analysis of the primary outcome will be carried out to determine the impact of the treatment  
15 effect when accounting for non-compliance of the allocated intervention (i.e. SRT session  
16 attendance). CACE is a measure of the causal effect of an intervention for participants who  
17 received it as intended by the original group allocation. We will also explore the effect of level  
18 of adherence to prescribed bed and rise-times (captured by sleep diaries) on the primary  
19 outcome in those who received SRT.  
20  
21  
22  
23  
24  
25  
26  
27  
28  
29  
30  
31  
32  
33  
34  
35  
36  
37  
38  
39  
40  
41  
42

### 43 *Economic analysis*

44  
45  
46 A within-trial economic evaluation alongside the RCT will estimate the incremental cost-  
47 effectiveness of SRT+SH over SH, from both NHS and societal perspectives. In our economic  
48 analyses we will adopt the UK NHS and personal social services perspective, consistent with  
49 NICE guidelines (53). Additional analyses will examine costs from a societal perspective,  
50 quantifying productivity losses in relation to absenteeism and presenteeism.  
51  
52  
53  
54  
55  
56  
57  
58  
59  
60



1  
2  
3 From trial records we will quantify participants' attendance at SRT sessions and hence nurse  
4 time and also assess the resources used in training. We will collect data on health care usage  
5 through GP records (medication use) and a self-reported version of CSRI (43). The Personal  
6 Social Services Research Unit (PSSRU) Costs of Health and Social Care (54) and NHS  
7 Reference Costs (55) will be used to apply national average unit costs to service utilisation and  
8 construct a cost profile per participant. Productivity will be quantified from the Work  
9 Productivity and Activity Impairment (WPAI; 39) questionnaire, and costed using the human  
10 capital approach.  
11  
12

13  
14  
15  
16  
17  
18  
19  
20  
21  
22 Analysis of the ISI (assessed at baseline, 3, 6 and 12 months) will indicate the incremental cost  
23 per unit change in self-reported insomnia severity. As recommended by NICE, cost-utility  
24 analysis will examine incremental QALYs. This will be achieved through collecting data on  
25 health status using the EQ-5D-3L (44) at baseline, 3, 6 and 12 months, and calculating the area  
26 under the curve. An incremental cost-effectiveness ratio will be calculated using costs-per-  
27 QALY with a 12-month time horizon. We will add a sleep dimension (56) to the standard EQ-  
28 5D-3L allowing us to examine, in exploratory analysis, the relationship between sleep bolt-on  
29 responses and other measures of insomnia severity, to identify whether the sleep question  
30 correlates with other measures of sleep satisfaction and self-reported health. Probabilistic and  
31 deterministic sensitivity analysis will be conducted to characterise the uncertainty around the  
32 cost-effectiveness estimates.  
33  
34  
35  
36  
37  
38  
39  
40  
41  
42  
43  
44  
45  
46  
47

#### 48 *Qualitative analysis*

49  
50 We will use a Framework approach (57) for qualitative data analysis supported by QSR NVivo  
51 (version 11), with the framework based on the main areas of implementation, mechanisms of  
52 impact, and contextual factors together with the more detailed issues that arise from these.  
53  
54  
55  
56  
57  
58 Analysis will occur as the interviews are transcribed and this analysis will allow schedules and  
59  
60

1  
2  
3 data collection to be further developed. We will analyse qualitative process data prior to  
4  
5 knowing trial outcomes to avoid biased interpretation.  
6  
7  
8  
9

### 10 **Patient and public involvement**

11  
12  
13 Four people from the Healthier Ageing Public and Patient Involvement (HAPPI) group,  
14  
15 University of Lincoln, read and provided detailed comments on the original grant proposal,  
16  
17 helping to shape key methodological choices (e.g., measurement selection). Two individuals  
18  
19 will contribute during the trial by reviewing participant information sheets, consent form,  
20  
21 therapy workbooks and questionnaire measures. They will advise on recruitment procedures  
22  
23 and methods to engage prospective participants/ retain enrolled participants. Finally they will  
24  
25 support the dissemination of trial results through review of the final report to the funder, lay  
26  
27 summary (which we will send to trial participants on completion of analysis), and media  
28  
29 releases by the University of Oxford.  
30  
31  
32  
33

### 34 **Ethics and dissemination**

35  
36  
37 The trial has received both Health Research Authority approval (IRAS: 238138) and ethical  
38  
39 approval (Yorkshire & the Humber - Bradford Leeds Research Ethics Committee, reference:  
40  
41 18/YH/0153). We will publish our findings in high-impact, peer-reviewed journals. We will  
42  
43 send trial participants a summary of study outcomes.  
44  
45  
46

### 47 **Trial status**

48  
49  
50 The trial commenced recruitment in August 2018 and will continue recruiting until  
51  
52 approximately March 2020, with final outcome data expected around April 2021.  
53  
54

### 55 **Contributors**

1  
2  
3 SDK is the Chief Investigator, conceived the project, had overall responsibility for the trial  
4 design and treatment design, and drafted the trial protocol. CM contributed to the trial protocol  
5 and drafted the manuscript. PA, CAE, PB, AS, LMY, LA, EO, SA contributed to trial design.  
6  
7 SDK, CAE and AS contributed to treatment design. LMY is responsible for statistical analysis.  
8  
9 LA is responsible for economic analysis. AS/SA are responsible for the process evaluation  
10 analysis. NB is the Trial Manager and helped draft the manuscript. Centre leads are SDK/PA  
11 (Oxford), PB (Greater Manchester) and AS (Lincoln). All authors inputted to the trial protocol  
12 and commented on the manuscript.  
13  
14  
15  
16  
17  
18  
19  
20  
21  
22

### 23 **Funding**

24  
25  
26 The trial is funded by the National Institute for Health Research Health Technology  
27 Assessment Programme. HTA Project: 16/84/01. SDK and CE are supported by the National  
28 Institute for Health Research (NIHR) Oxford Biomedical Research Centre (BRC) based at  
29 Oxford University Hospitals NHS Trust and the University of Oxford. The views expressed  
30 are those of the authors and not necessarily those of the NHS, the NIHR or the Department of  
31 Health.  
32  
33  
34  
35  
36  
37  
38  
39  
40

### 41 **Competing interests**

42  
43  
44 Colin Espie is co-founder of and shareholder in Big Health Ltd, a company which specialises  
45 in the digital delivery of cognitive behavioural therapy for sleep improvement (the Sleepio  
46 programme). This study is in no way connected to Big Health Ltd or Sleepio. SDK declares  
47 non-financial support from Big Health Ltd. in relation to no-cost access to Sleepio for use in  
48 clinical trial research. All other authors declare no competing interests.  
49  
50  
51  
52  
53  
54  
55  
56  
57  
58  
59  
60

1  
2  
3  
4  
5  
6  
7  
8  
9  
10  
11  
12  
13  
14  
15  
16  
17  
18  
19  
20  
21  
22  
23  
24  
25  
26  
27  
28  
29  
30  
31  
32  
33  
34  
35  
36  
37  
38  
39  
40  
41  
42  
43  
44  
45  
46  
47  
48  
49  
50  
51  
52  
53  
54  
55  
56  
57  
58  
59  
60

For peer review only

### References

1. American Psychiatric Association. Diagnostic and Statistical Manual of Mental Disorders (5th ed.). American Psychiatric Association, Arlington, VA, 2013.
2. Kyle SD, Espie CA, Morgan K. “..Not just a minor thing, it is something major, which stops you from functioning daily’: Quality of Life and Daytime Functioning in Insomnia”. *Behav Sleep Med* 2010; 8: 123-140.

3. Kyle SD, Crawford M, Morgan K, Spiegelhalder K, Clark A, Espie CA. The Glasgow Sleep Impact Index (GSII): a novel patient-centred measure for assessing sleep-related quality of life impairment in Insomnia Disorder. *Sleep Med* 2013; 14: 493-501.
4. Morin CM, Benca R. Chronic insomnia. *Lancet* 2012; 379: 1129-41.
5. Vgontzas AN, Fernandez-Mendoza J, Duanping L, Bixler EO. Insomnia with objective short sleep duration: The most biologically severe phenotype of the disorder. *Sleep Med Rev* 2013; 17: 241-254.
6. Lane JM, Jones SE, Dashti HS, et al. Biological and clinical insights from genetics of insomnia symptoms. *Nature Genetics* 2019; 51: 387-393.
7. Wickwire EM, Shaya FT, Scharf SM. Health economics of insomnia treatments: The return on investment for a good night's sleep. *Sleep Med Rev* 2016; 28: 72-82.
8. Daley M, Morin CM, LeBlanc M, Gregoire JP, Savard J. The economic burden of insomnia: direct and indirect costs for individuals with insomnia syndrome, insomnia symptoms and good sleepers. *Sleep* 2009; 32: 55-64.
9. Leger D, Bayon V. Societal costs of insomnia. *Sleep Med Rev* 2010; 14:379-389.
10. van der Zwerde T, Bisdounis L, Kyle S.D., Lancee J, van Straten A. Long-term effects of cognitive behavioral therapy for insomnia: a meta-analysis. *Sleep Med Rev* 2019; 12: 101208. doi: 10.1016/j.smrv.2019.08.002. [Epub ahead of print]
11. Qaseem A, Kansagara D, Forcica MA, et al. Management of chronic insomnia disorder in adults: A clinical practice guideline from the American College of Physicians. *Ann Intern Med* 2016; 165: 126-133.
12. Riemann D, Baglioni C, Bassetti C, et al. European guideline for the diagnosis and treatment of insomnia. *J Sleep Res* 2017; 26:675-700.
13. National Institute for Health and Care Excellence. <http://cks.nice.org.uk/insomnia#!scenario:1>
14. Everitt H, McDermott L, Leydon G, Yules H, Baldwin D, Little P. GPs' management strategies for patients with insomnia: a survey and qualitative interview study. *Br J Gen Pract* 2014; 64: e112-e119.
15. Siriwardena AN, Qureshi MZ, Dyas JV, Orner R. Magic bullets for insomnia? Patients' use and experiences of newer (Z drugs) versus older (benzodiazepine) hypnotics for sleep problems in primary care. *Br J Gen Pract* 2008; 58: 417-422.
16. Everitt H, Baldwin DS, Stuart B, et al. Antidepressants for insomnia in adults. *Cochrane Database Syst Rev* 2018  
<https://doi.org/10.1002/14651858.CD010753.pub2>
17. Buysse DJ, Germain A, Moul DE, et al. Efficacy of brief behavioural treatment for chronic insomnia in older adults. *Arch Intern Med* 2011; 171:887-95.
18. Espie CA, Inglis SJ, Tessler S, Harvey L. The clinical effectiveness of cognitive behavior therapy for chronic insomnia: implementation and evaluation of a sleep clinic in general medical practice. *Behav Res Ther* 2001; 39: 45-60.
19. Espie CA, MacMahon KM, Kelly HL, Broomfield NM, Douglas NJ, Engleman HM, et al. Randomized clinical effectiveness trial of nurse-administered small-group cognitive behavior therapy for persistent insomnia in general practice. *Sleep* 2007; 30: 574-84.
20. Espie CA, Fleming L, Cassidy J, Samuel L, Taylor L, White C. et al. Randomized controlled clinical effectiveness trial of cognitive behavior therapy compared with treatment as usual for persistent insomnia in patients with cancer. *J Clin Oncol* 2008; 26: 4651-4658.
21. Maurer LF, Espie, CA, Kyle SD. How does sleep restriction therapy for insomnia work? A systematic review of mechanistic evidence and the introduction of the Triple-R model. *Sleep Med Rev* 2018; 42:127-138.

22. Miller CB, Espie CA, Epstein DR, Friedman L, Morin CM, Pigeon WR, Spielman AJ, Kyle SD. The evidence-base of sleep restriction therapy for treating insomnia disorder. *Sleep Med Rev* 2014; 18: 415-24.
23. Krieger T, Urech A, Duss SB, et al. A randomized controlled trial comparing guided internet-based multi-component treatment and internet-based guided sleep restriction treatment to care as usual in insomnia. *Sleep Med* 2019;62:43-52.
24. Drake CL, Kalmbach DA, Arnedt JT, et al. Treating chronic insomnia in postmenopausal women: a randomized clinical trial comparing cognitive-behavioral therapy for insomnia, sleep restriction therapy, and sleep hygiene education. *Sleep* 2019;42: <https://doi.org/10.1093/sleep/zsy217>
25. Falloon K, Elley CR, Fernando 3<sup>rd</sup> A, Lee AC, Arroll B. Simplified sleep restriction for insomnia in general practice: a randomized controlled trial. *Br J Gen Pract* 2015; 65: e508-15.
26. Kyle SD, Morgan K, Spiegelhalder K, Espie CA. No pain, no gain: An exploratory within-subjects mixed-methods evaluation of the patient experience of sleep restriction therapy. *Sleep Med* 2011; 12: 735-747.
27. Sargent GM, Forrest LE, Parker RM. Nurse delivered lifestyle interventions in primary health care to treat chronic disease risk factors associated with obesity: a systematic review. *Obesity Rev* 2012; 13: 1148-71.
28. Morgan K, Dixon S, Mathers N, Thompson J, Tomeny M. Psychological treatment for insomnia in the management of long-term hypnotic drug use: a pragmatic randomized controlled trial. *Br J Gen Pract* 2003; 53:923-8.
29. Morgan, K., Gregory, P., Tomeny, M., David, B.M., Gascoigne, C. Self-help treatment for insomnia symptoms associated with chronic conditions in older adults: a randomized controlled trial. *J Am Geriatric Soc* 2012;60:1803-10.
30. Espie CA, Kyle SD, Hames P, Gardani M, Fleming L, Cape J. The Sleep Condition Indicator: a clinical screening tool to evaluate Insomnia Disorder. *BMJ Open* 2014; 4:e004183 doi:10.1136/bmjopen-2013-004183.
31. Wilson SJ, Nutt DJ, Alford C, et al. British Association for Psychopharmacology consensus statement on evidence-based treatment of insomnia, parasomnias and circadian rhythm disorders. *J Psychopharmacol* 2010;24(11):1577-1600.
32. Beck AT, Ward CH, Mendelson M, Mock J, Erbaugh J. An inventory for measuring depression. *Arch Gen Psychiatry* 1961; 6: 561-71.
33. Espie CA, Emsley R, Kyle SD., et al. The impact of treating insomnia upon functional health, psychological wellbeing and sleep-related quality of life: a randomized controlled trial with mediation analysis. *JAMA Psych* 2018; doi: 10.1001/jamapsychiatry.2018.2745.
34. Hoffman T, Glasziou PP, Boutron I, et al. Better reporting of interventions: template for intervention description and replication (TIDieR) checklist and guide. *BMJ* 2014;348:g1687 10.1136/bmj.g1687.
35. Kyle SD, Acquino R, Henry A, Crawford M, Miller C, Espie CA, Spielman A. Towards standardisation and improved understanding of Sleep Restriction Therapy for insomnia disorder: A systematic review of CBT-I trial content. *Sleep Med Rev* 2015; 23: 83-88.
36. Morin CM, Belleville G, Belanger L, Ivers H. The insomnia severity index: psychometric indicators to detect insomnia cases and evaluate treatment response. *Sleep* 2011 34:601-608.
37. Kroenke K, Spitzer RL, Williams JB, Löwe B. The PHQ-9: validity of a brief depression severity measure. *J Gen Intern Med* 2001;32:345-359.
38. Ware JE, Sherbourne CD. The Mos 36-Item Short-Form Health Survey (Sf-36) .1. Conceptual-Framework and Item Selection. *Med Care* 1992; 30: 473-83.
39. Reilly MC, Zbrozek AS, Dukes EM. The validity and reproducibility of a work productivity and activity impairment instrument. *Pharmacoeconomics* 1993; 4:353-65.

- 1
- 2
- 3
- 4 40. Broomfield NM, Espie CA. Towards a valid, reliable measure of sleep effort. *J Sleep*
- 5 *Res* 2005; 14: 401–407.
- 6 41. Nicassio PM, Mendlowitz DR, Fussell JJ, Petras L. The phenomenology of the pre-sleep
- 7 state: The development of the pre-sleep arousal scale. *Behav Res Ther* 1985; 23: 263–
- 8 271.
- 9 42. Carney CE, Buysse DJ, Ancoli-Israel S, Edinger JD, Krystal AD, Lichstein KL, Morin C.M.
- 10 The consensus sleep diary: standardizing prospective sleep self-monitoring. *Sleep* 2012;35:
- 11 287-302.
- 12 43. Beecham J, Knapp M. (2001) Costing psychiatric interventions, in G. Thornicroft
- 13 (ed.) *Measuring Mental Health Needs*, Gaskell, 2<sup>nd</sup> edition, 200-224.
- 14 44. Rabin R, de Charoo F. EQ-5D: a measure of health status from the EuroQoL group. *Ann*
- 15 *Med* 2001;5:337-343.
- 16 45. Moore G, Audrey S, Barker M, et al. Process evaluation of complex interventions: Medical
- 17 Research Council guidance. *BMJ* 2015; 350: h1258
- 18 46. Van Straten A, van der Zweerde T, Kleiboer A, Cuijpers P, Morin CM, Lancee J. Cognitive
- 19 and behavioural therapies in the treatment of insomnia: a meta-analysis. *Sleep Med Rev*
- 20 2018;38:3-16.
- 21 47. Abell JG, Shipley MJ, Ferrie JE, Kivimäki M, Kumari M. Association of
- 22 chronic insomnia symptoms and recurrent extreme sleep duration over 10 years with well-
- 23 being in older adults: a cohort study. *BMJ Open* 2016 Feb 1;6(2):e009501.
- 24 48. Dyas JV, Togher F, Siriwardena AN. Intervention fidelity in primary care complex
- 25 intervention trials: qualitative study using telephone interviews of patients and practitioners.
- 26 *Qual Prim Care* 2014; 22: 25-34.
- 27 49. Guest G, Bunce A, Johnson L. How many interviews are enough? An experiment with data
- 28 saturation and variability. *Field Methods* 2006; 18(1): 59-82.
- 29 50. Schulz KF, Altman DG, Moher D, for the CONSORT group. CONSORT 2010 Statement:
- 30 updated guidelines for reporting parallel group randomised trials. *Trials* 2010;11:32.
- 31 51. Baron R, Kenny DA. The moderator-mediator variable distinction in social psychological
- 32 research. *J Pers Soc Psychol* 1986; 5: 1173–82.
- 33 52. Freeman D, Sheaves B. et al. The effects of improving sleep on mental health (OASIS): a
- 34 randomised controlled trial with mediation analysis. *Lancet Psych* 2017; 4(10): 749-758.
- 35 53. National Institute for Health and Care Excellent (NICE). Developing NICE guidelines: the
- 36 manual. Process and methods [PMG20].
- 37 <https://www.nice.org.uk/process/pmg20/chapter/introduction-and-overview>
- 38 54. Curtis L, Burns A. Unit Costs of Health and Social Care 2018. Personal Social Services
- 39 Research Unit, University of Kent, Canterbury.
- 40 <https://doi.org/10.22024/UniKent/01.02.70995>
- 41 55. National Health Service (NHS) Reference Costs.
- 42 <https://improvement.nhs.uk/resources/reference-costs/>
- 43 56. Yang Y, Brazier J, Tsuchiya A. Effect of adding a sleep dimension to the EQ-5D descriptive
- 44 system: a “bolt-on” experiment. *Med Decis Making* 2014; 34:42-53.
- 45 57. Ritchie J, Lewis J. Qualitative research practice. SAGE Publications, London 2003.
- 46
- 47
- 48
- 49
- 50
- 51
- 52
- 53
- 54
- 55
- 56
- 57
- 58
- 59
- 60

#### List of tables and figures

#### *Table 1: Objectives and outcome measures*

| Objectives                                                                                                                                                                                                                                                     | Outcome Measures                                                                                                                                                                                                                                                                                                                                                                                                                                                       | Timepoint(s) of evaluation of this outcome measure                                                                                                        |
|----------------------------------------------------------------------------------------------------------------------------------------------------------------------------------------------------------------------------------------------------------------|------------------------------------------------------------------------------------------------------------------------------------------------------------------------------------------------------------------------------------------------------------------------------------------------------------------------------------------------------------------------------------------------------------------------------------------------------------------------|-----------------------------------------------------------------------------------------------------------------------------------------------------------|
| <p><b>Primary Objective:</b><br/>To compare the effect of SRT+SH versus SH on insomnia severity</p>                                                                                                                                                            | Self-rated insomnia severity using the ISI questionnaire                                                                                                                                                                                                                                                                                                                                                                                                               | Baseline, 3, 6- and 12-months post-randomisation.<br><i>Primary outcome is at 6 months.</i>                                                               |
| <p><b>Secondary Objectives:</b><br/>To compare the effect of SRT+SH versus SH on HRQoL</p>                                                                                                                                                                     | Self-rated HRQoL using the SF-36 questionnaire (Total Score, MCS, PCS)                                                                                                                                                                                                                                                                                                                                                                                                 | Baseline, 3, 6- and 12-months post-randomisation.                                                                                                         |
| To compare the effect of SRT+SH versus SH on subjective sleep                                                                                                                                                                                                  | Subjective sleep recorded over 7 nights using the CSD<br><br>(SOL;WASO;SE;TST;SQ)                                                                                                                                                                                                                                                                                                                                                                                      | Baseline, 6- and 12-months post-randomisation.                                                                                                            |
| To compare the effect of SRT+SH versus SH on objective estimates of sleep                                                                                                                                                                                      | Actigraphy-defined sleep over 7 nights<br><br>(SOL; WASO; SE; TST)                                                                                                                                                                                                                                                                                                                                                                                                     | Baseline, 6- and 12-months post-randomisation.                                                                                                            |
| To compare the effect of SRT+SH versus SH on 1) patient-generated quality of life; 2) depressive symptoms; 3) work productivity; 4) hypnotic medication use; 5) use of other prescribed sleep-promoting medications; and 6) pre-sleep arousal and sleep effort | <ol style="list-style-type: none"> <li>1. Self-rated quality of life using the GSII [Ranks 1,2,3]</li> <li>2. Self-rated depressive symptoms severity using the PHQ-9</li> <li>3. Self-rated WPAI questionnaire</li> <li>4. Use of prescribed hypnotics (quantified from 7-day diary)</li> <li>5. Use of other prescribed sleep-promoting medications (quantified from 7-day diary)</li> <li>6. Self-rated arousal and sleep effort using the PSAS and GSES</li> </ol> | Baseline, 3, 6- and 12-months post-randomisation.<br><br>Medication use will be quantified from diaries at baseline, 6- and 12-months post-randomisation. |
| To compare the incremental cost-effectiveness of SRT+SH over SH, from both NHS and societal perspectives                                                                                                                                                       | Trial records (time and number of nurse-led appointments), practice records* (medications), CSRI, ISI, WPAI, EQ-5D-3L                                                                                                                                                                                                                                                                                                                                                  | Baseline, 3, 6- and 12-months post-randomisation.<br><br>*Baseline and 12 months only                                                                     |
| To undertake a process evaluation to explain trial results and understand intervention delivery, fidelity and acceptability.                                                                                                                                   | Semi-structured interviews with 1) trial participants; 2) nurses; 3) GPs or practice managers.                                                                                                                                                                                                                                                                                                                                                                         | Throughout the trial.                                                                                                                                     |
| <p><i>Moderator analysis:</i></p> <p>Test whether objective short sleep duration at baseline (&lt; 6hrs vs. ≥ 6hrs) moderates the effect of SRT on clinical outcomes (at 6 months)</p>                                                                         | Actigraphy, ISI, GSII, SF-36                                                                                                                                                                                                                                                                                                                                                                                                                                           | Baseline and 6 months.                                                                                                                                    |



|                                                                                                                                                                                                                                                                           |                                                                          |                                       |
|---------------------------------------------------------------------------------------------------------------------------------------------------------------------------------------------------------------------------------------------------------------------------|--------------------------------------------------------------------------|---------------------------------------|
| <p><i>Mediator analysis:</i></p> <p>Test whether group difference on the ISI (6 months) is mediated by change in pre-sleep arousal (PSAS) and sleep effort (GSES) assessed at month 3</p> <p>Test whether SRT adherence mediates degree of clinical change on the ISI</p> | <p>ISI, PSAS, GSES</p> <p>Sleep diary during intervention phase, ISI</p> | <p>Baseline, 3 and 6 months.</p>      |
| <p>To compare the number of specified adverse events between the groups</p>                                                                                                                                                                                               | <p>Questionnaire</p>                                                     | <p>Baseline, 3, 6, and 12 months.</p> |

CSD = Consensus Sleep Diary; CSRI = client service receipt inventory; EQ-5D-3L = EuroQol questionnaire; GSES = Glasgow sleep effort scale; GSII = Glasgow sleep impact index; HRQoL = health-related quality of life; ISI = insomnia severity index; MCS = mental component summary score; PCS = physical component summary score; PHQ-9 = patient health questionnaire; PSAS = pre-sleep arousal scale; SE = sleep efficiency; SOL = sleep-onset latency; SF-36 = short-form 36 questionnaire; SH = sleep hygiene; SRT = sleep restriction therapy; SQ = sleep quality; TST = total sleep time; WASO = wake-time after sleep onset; WPAI = work productivity and activity impairment questionnaire.

Peer review only

Figure 1: Trial Flow

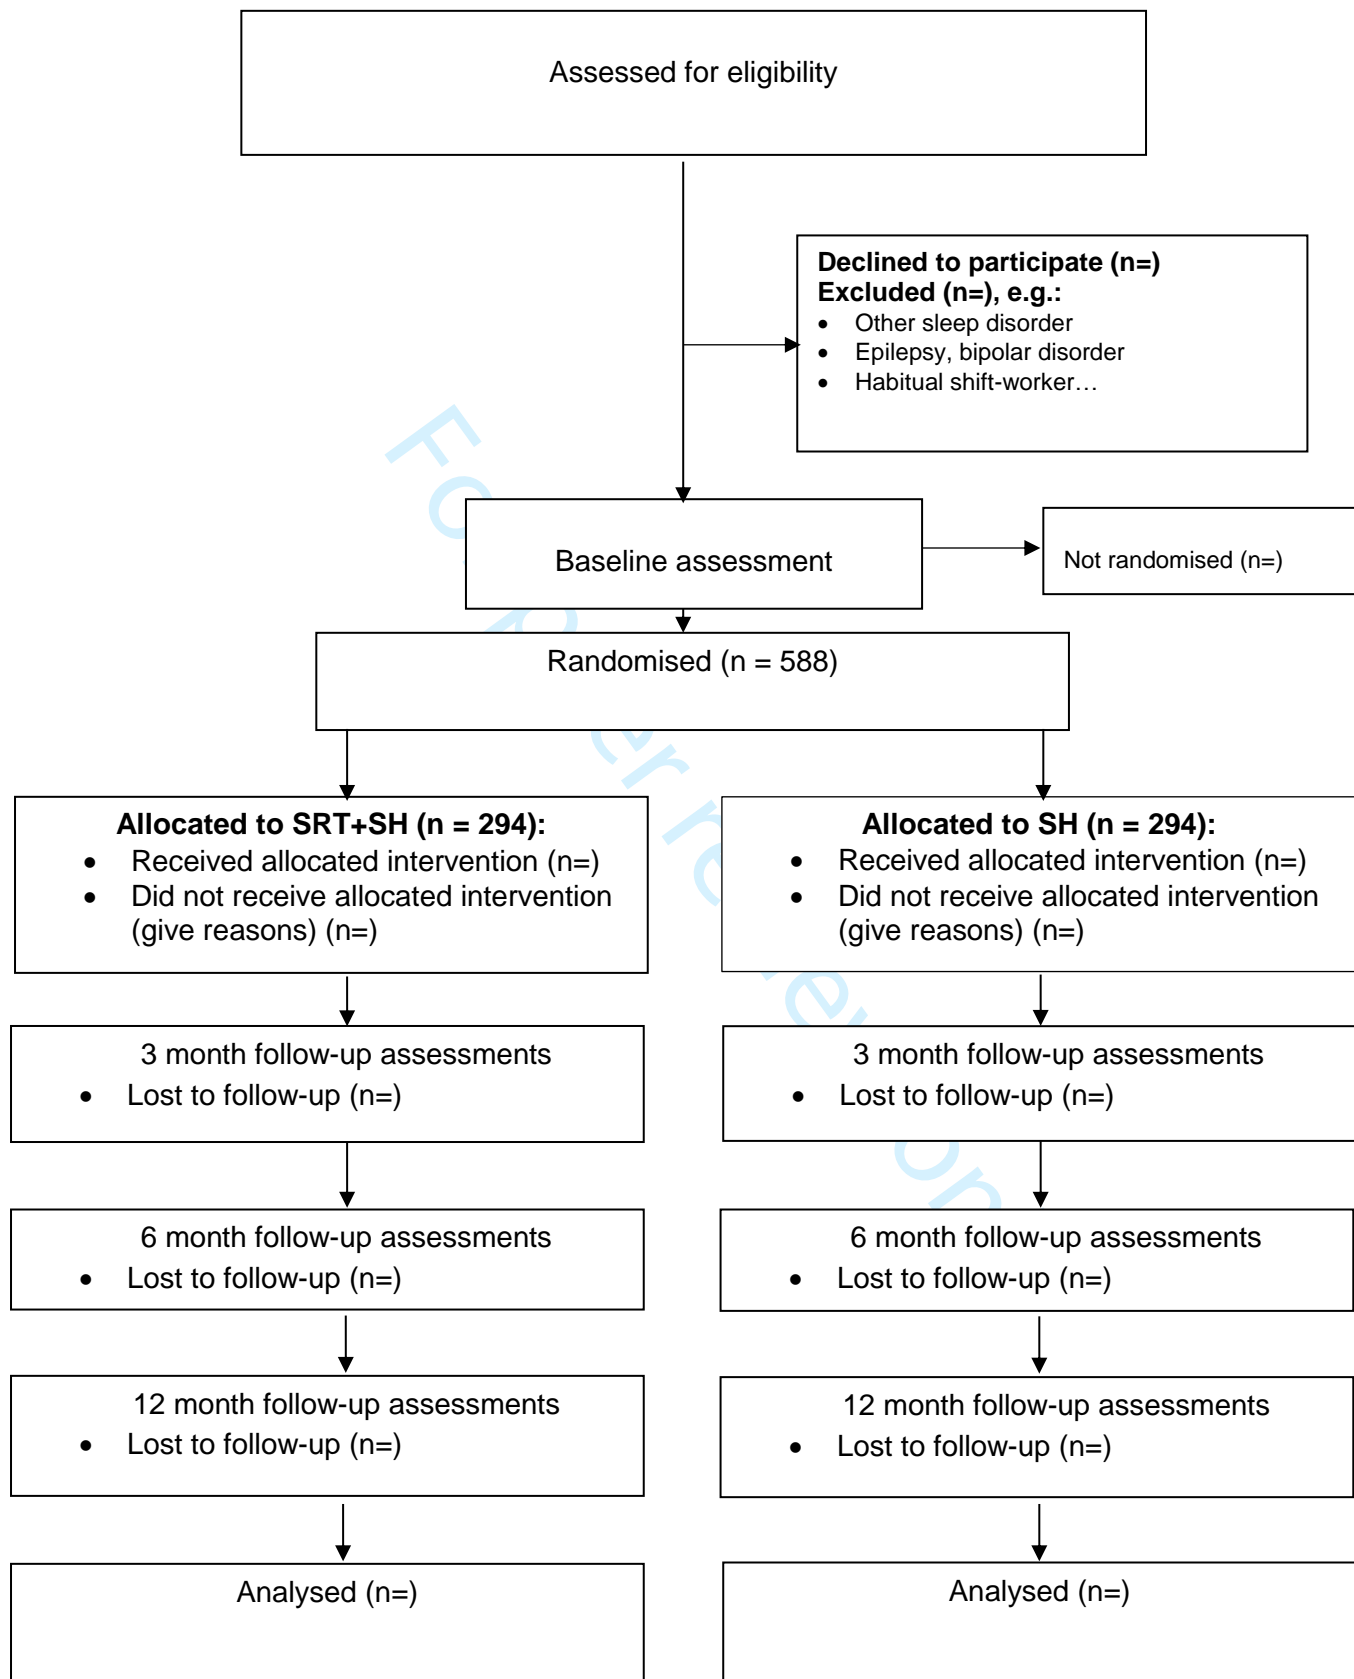

Supplementary Table 1: Template for Intervention Description and Replication (TIDieR) checklist

| <i>Name of intervention</i> | Sleep Restriction Therapy (SRT) for Insomnia Disorder                                                                                                                                                                                                                                                                                                                                                                                                                                                                                                                                                                                                                                                                                                                                                                                                                                                                                                                                                                                                                                                                                                                                                                                                                                                                                                                                                                                                                                                                                   |
|-----------------------------|-----------------------------------------------------------------------------------------------------------------------------------------------------------------------------------------------------------------------------------------------------------------------------------------------------------------------------------------------------------------------------------------------------------------------------------------------------------------------------------------------------------------------------------------------------------------------------------------------------------------------------------------------------------------------------------------------------------------------------------------------------------------------------------------------------------------------------------------------------------------------------------------------------------------------------------------------------------------------------------------------------------------------------------------------------------------------------------------------------------------------------------------------------------------------------------------------------------------------------------------------------------------------------------------------------------------------------------------------------------------------------------------------------------------------------------------------------------------------------------------------------------------------------------------|
| <i>Why</i>                  | Insomnia is assumed to be maintained, in part, by excessive amounts of time in bed and irregular sleep-wake schedules, which serve to fragment sleep. Time in bed awake further contributes to insomnia because the bed/bedroom environment may become associated with wakefulness over time; subsequently acting as a trigger for arousal and sleep fragmentation. SRT aims to: 1) restrict time in bed (to enhance sleep efficiency); 2) regularise the timing of the sleep-wake cycle; and 3) recondition the bed-sleep association (21).                                                                                                                                                                                                                                                                                                                                                                                                                                                                                                                                                                                                                                                                                                                                                                                                                                                                                                                                                                                            |
| <i>What: Materials</i>      | <p><i>Materials for patients:</i> patients will be provided with a folder at the beginning of the intervention. This folder contains: a copy of the slides used during session 1; worksheets to complete during sessions 1-4; sleep diaries and sleep efficiency grids to enable recording of sleep efficiency each day during the 4-week intervention period; and a booklet which contains enhanced information on the background and implementation of SRT, including quotes from patients who have previously undergone SRT, as well as guidance on sleep hygiene. This guidance briefly covers lifestyle behaviours (e.g., caffeine, alcohol use, exercise) and environmental factors (e.g., light, temperature) that influence sleep.</p> <p><i>Materials for nurses:</i> nurses will be provided with a training folder (as part of a 4-hour training session) which contains background information on sleep, insomnia (including its development and maintenance) and SRT. The folder also contains a list of frequently asked questions in relation to trouble-shooting and specific patient scenarios that may arise, with standardised guidance on how to navigate. Nurses will be provided with access to two recorded videos that give an overview of insomnia and SRT implementation. Nurses will be provided with a power-point slide set to work through with each patient during session 1. They will also work through a structured checklist (completed online) for each session to guide content and structure.</p> |
| <i>What: Procedures</i>     | In session 1 the nurse will work through Power-Point slides with the participant to introduce the rationale for SRT alongside a review of (baseline) sleep diaries, selection of bed and rise-times (for the following seven nights), management of daytime sleepiness (including implications for driving), and discussion of barriers/facilitators to implementation. Participants will be provided with diaries and sleep efficiency calculation grids to support implementation of SRT instructions and permit weekly review of progress. Sessions 2, 3 and 4 will be brief sessions to review progress, trouble-shoot any difficulties and advise upon titration of the sleep schedule.                                                                                                                                                                                                                                                                                                                                                                                                                                                                                                                                                                                                                                                                                                                                                                                                                                            |
| <i>Who provided</i>         | Registered practice nurses in primary care and research nurses from clinical research networks will be trained to deliver SRT.                                                                                                                                                                                                                                                                                                                                                                                                                                                                                                                                                                                                                                                                                                                                                                                                                                                                                                                                                                                                                                                                                                                                                                                                                                                                                                                                                                                                          |
| <i>How provided</i>         | Intervention is delivered one-to-one, involving both face-to-face (sessions 1 and 3) and over the phone contacts (sessions 2 and 4).                                                                                                                                                                                                                                                                                                                                                                                                                                                                                                                                                                                                                                                                                                                                                                                                                                                                                                                                                                                                                                                                                                                                                                                                                                                                                                                                                                                                    |
| <i>Where</i>                | The face-to-face sessions will take place in a consultation room within general practice.                                                                                                                                                                                                                                                                                                                                                                                                                                                                                                                                                                                                                                                                                                                                                                                                                                                                                                                                                                                                                                                                                                                                                                                                                                                                                                                                                                                                                                               |
| <i>When and how much</i>    | <p>Intervention will be delivered over four sessions. Duration and format of sessions is as follows:</p> <ul style="list-style-type: none"> <li>• session 1 (in-person, ~30 minutes)</li> <li>• session 2 (by phone, ~10 minutes)</li> <li>• session 3 (in-person, ~15 minutes)</li> <li>• session 4 (by phone, ~10 minutes).</li> </ul>                                                                                                                                                                                                                                                                                                                                                                                                                                                                                                                                                                                                                                                                                                                                                                                                                                                                                                                                                                                                                                                                                                                                                                                                |

1  
2  
3  
4  
5  
6  
7  
8  
9  
10  
11  
12  
13  
14  
15  
16  
17  
18  
19  
20  
21  
22  
23  
24  
25  
26  
27  
28  
29  
30  
31  
32  
33  
34  
35  
36  
37  
38  
39  
40  
41  
42  
43  
44  
45  
46  
47  
48  
49  
50  
51  
52  
53  
54  
55  
56  
57  
58  
59  
60

| <i>Tailoring</i>                                                                           | <p>The treatment will be tailored to each individual's sleep pattern but follows standardised instructions for setting and titrating time in bed (TIB):</p> <table border="1" data-bbox="475 293 1369 808"> <thead> <tr> <th data-bbox="475 293 730 338">Criterion</th> <th data-bbox="738 293 1369 338">SRT</th> </tr> </thead> <tbody> <tr> <td data-bbox="475 338 730 443">Calculation of prescribed time in bed (TIB)</td> <td data-bbox="738 338 1369 443">Based on average total sleep time (TST) from baseline 7-day sleep diary. Minimum TIB = 5 hrs.</td> </tr> <tr> <td data-bbox="475 443 730 517">Rise time selection</td> <td data-bbox="738 443 1369 517">Time that aligns with working schedule and can be adhered to 7 days a week</td> </tr> <tr> <td data-bbox="475 517 730 562">Bed time selection</td> <td data-bbox="738 517 1369 562">Typically delayed in order to equal the prescribed TIB.</td> </tr> <tr> <td data-bbox="475 562 730 763">Weekly adjustments to TIB based on average sleep efficiency for 7 days (SE) (sessions 2-4)</td> <td data-bbox="738 562 1369 763">           a) SE <math>\geq</math> 85% increase TIB by 15 minutes<br/>           b) SE = 80-84% no change to TIB<br/>           c) SE <math>\leq</math> 79% decrease TIB by 15 minutes<br/><br/>           Adjustments (advancing or delaying) are typically made to the prescribed bed-time.         </td> </tr> <tr> <td data-bbox="475 763 730 808">Napping</td> <td data-bbox="738 763 1369 808">Recommendation to eliminate all napping</td> </tr> </tbody> </table> <p>The nurse will be encouraged to adapt the TIB prescription in the following circumstances: patient is struggling to adhere, or cannot tolerate the restriction; patient is excessively sleepy; or change in health precludes full implementation. In these circumstances nurses will be encouraged to agree a revised time in bed (increasing in 15 minute blocks) until the patient is content.</p> <p>On completion of nurse sessions participants are encouraged to continue self-implementing SRT on their own according to the standardised rules. Participants are provided with sleep diaries and grids to enable self-implementation at home. Once daytime functioning has improved and sleep efficiency remains high – and no further sleep is obtained with additional TIB – the participant has reached their optimal sleep schedule.</p> | Criterion | SRT | Calculation of prescribed time in bed (TIB) | Based on average total sleep time (TST) from baseline 7-day sleep diary. Minimum TIB = 5 hrs. | Rise time selection | Time that aligns with working schedule and can be adhered to 7 days a week | Bed time selection | Typically delayed in order to equal the prescribed TIB. | Weekly adjustments to TIB based on average sleep efficiency for 7 days (SE) (sessions 2-4) | a) SE $\geq$ 85% increase TIB by 15 minutes<br>b) SE = 80-84% no change to TIB<br>c) SE $\leq$ 79% decrease TIB by 15 minutes<br><br>Adjustments (advancing or delaying) are typically made to the prescribed bed-time. | Napping | Recommendation to eliminate all napping |
|--------------------------------------------------------------------------------------------|----------------------------------------------------------------------------------------------------------------------------------------------------------------------------------------------------------------------------------------------------------------------------------------------------------------------------------------------------------------------------------------------------------------------------------------------------------------------------------------------------------------------------------------------------------------------------------------------------------------------------------------------------------------------------------------------------------------------------------------------------------------------------------------------------------------------------------------------------------------------------------------------------------------------------------------------------------------------------------------------------------------------------------------------------------------------------------------------------------------------------------------------------------------------------------------------------------------------------------------------------------------------------------------------------------------------------------------------------------------------------------------------------------------------------------------------------------------------------------------------------------------------------------------------------------------------------------------------------------------------------------------------------------------------------------------------------------------------------------------------------------------------------------------------------------------------------------------------------------------------------------------------------------------------------------------------------------------------------------------------------------------------------------------------------------------------------------------------------------------------------------------------------------------------------------------------------------------------------------------------------------------------------------------------------------------------------------------------------------------------------------------------------------------------------------------|-----------|-----|---------------------------------------------|-----------------------------------------------------------------------------------------------|---------------------|----------------------------------------------------------------------------|--------------------|---------------------------------------------------------|--------------------------------------------------------------------------------------------|-------------------------------------------------------------------------------------------------------------------------------------------------------------------------------------------------------------------------|---------|-----------------------------------------|
| Criterion                                                                                  | SRT                                                                                                                                                                                                                                                                                                                                                                                                                                                                                                                                                                                                                                                                                                                                                                                                                                                                                                                                                                                                                                                                                                                                                                                                                                                                                                                                                                                                                                                                                                                                                                                                                                                                                                                                                                                                                                                                                                                                                                                                                                                                                                                                                                                                                                                                                                                                                                                                                                    |           |     |                                             |                                                                                               |                     |                                                                            |                    |                                                         |                                                                                            |                                                                                                                                                                                                                         |         |                                         |
| Calculation of prescribed time in bed (TIB)                                                | Based on average total sleep time (TST) from baseline 7-day sleep diary. Minimum TIB = 5 hrs.                                                                                                                                                                                                                                                                                                                                                                                                                                                                                                                                                                                                                                                                                                                                                                                                                                                                                                                                                                                                                                                                                                                                                                                                                                                                                                                                                                                                                                                                                                                                                                                                                                                                                                                                                                                                                                                                                                                                                                                                                                                                                                                                                                                                                                                                                                                                          |           |     |                                             |                                                                                               |                     |                                                                            |                    |                                                         |                                                                                            |                                                                                                                                                                                                                         |         |                                         |
| Rise time selection                                                                        | Time that aligns with working schedule and can be adhered to 7 days a week                                                                                                                                                                                                                                                                                                                                                                                                                                                                                                                                                                                                                                                                                                                                                                                                                                                                                                                                                                                                                                                                                                                                                                                                                                                                                                                                                                                                                                                                                                                                                                                                                                                                                                                                                                                                                                                                                                                                                                                                                                                                                                                                                                                                                                                                                                                                                             |           |     |                                             |                                                                                               |                     |                                                                            |                    |                                                         |                                                                                            |                                                                                                                                                                                                                         |         |                                         |
| Bed time selection                                                                         | Typically delayed in order to equal the prescribed TIB.                                                                                                                                                                                                                                                                                                                                                                                                                                                                                                                                                                                                                                                                                                                                                                                                                                                                                                                                                                                                                                                                                                                                                                                                                                                                                                                                                                                                                                                                                                                                                                                                                                                                                                                                                                                                                                                                                                                                                                                                                                                                                                                                                                                                                                                                                                                                                                                |           |     |                                             |                                                                                               |                     |                                                                            |                    |                                                         |                                                                                            |                                                                                                                                                                                                                         |         |                                         |
| Weekly adjustments to TIB based on average sleep efficiency for 7 days (SE) (sessions 2-4) | a) SE $\geq$ 85% increase TIB by 15 minutes<br>b) SE = 80-84% no change to TIB<br>c) SE $\leq$ 79% decrease TIB by 15 minutes<br><br>Adjustments (advancing or delaying) are typically made to the prescribed bed-time.                                                                                                                                                                                                                                                                                                                                                                                                                                                                                                                                                                                                                                                                                                                                                                                                                                                                                                                                                                                                                                                                                                                                                                                                                                                                                                                                                                                                                                                                                                                                                                                                                                                                                                                                                                                                                                                                                                                                                                                                                                                                                                                                                                                                                |           |     |                                             |                                                                                               |                     |                                                                            |                    |                                                         |                                                                                            |                                                                                                                                                                                                                         |         |                                         |
| Napping                                                                                    | Recommendation to eliminate all napping                                                                                                                                                                                                                                                                                                                                                                                                                                                                                                                                                                                                                                                                                                                                                                                                                                                                                                                                                                                                                                                                                                                                                                                                                                                                                                                                                                                                                                                                                                                                                                                                                                                                                                                                                                                                                                                                                                                                                                                                                                                                                                                                                                                                                                                                                                                                                                                                |           |     |                                             |                                                                                               |                     |                                                                            |                    |                                                         |                                                                                            |                                                                                                                                                                                                                         |         |                                         |
| <i>How well</i>                                                                            | <p>Face-to-face sessions are audio-recorded and independently appraised for fidelity by a Clinical Psychologist experienced in cognitive behavioural therapy for insomnia. Nurses follow and 'sign-off' a checklist at the end of each session in order to capture duration of session and adherence to treatment instructions.</p>                                                                                                                                                                                                                                                                                                                                                                                                                                                                                                                                                                                                                                                                                                                                                                                                                                                                                                                                                                                                                                                                                                                                                                                                                                                                                                                                                                                                                                                                                                                                                                                                                                                                                                                                                                                                                                                                                                                                                                                                                                                                                                    |           |     |                                             |                                                                                               |                     |                                                                            |                    |                                                         |                                                                                            |                                                                                                                                                                                                                         |         |                                         |

**Study Title:** HABIT (HHealth professional Administered Brief Insomnia Therapy) Study

**Chief Investigator: Dr Simon Kyle**

The University of Oxford

Email: [habit.study@phc.ox.ac.uk](mailto:habit.study@phc.ox.ac.uk)

Tel: 01865-289-591

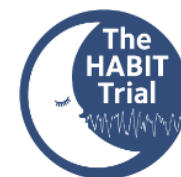

Research Ethics Committee: Yorkshire and The Humber – Bradford Leeds

**PARTICIPANT INFORMED CONSENT FORM**

Please INITIAL  
 each box

|                                                                                                                                                                                                                                                                                                                                                                                                                                                                                       |     |    |
|---------------------------------------------------------------------------------------------------------------------------------------------------------------------------------------------------------------------------------------------------------------------------------------------------------------------------------------------------------------------------------------------------------------------------------------------------------------------------------------|-----|----|
| 1. I confirm I have read and understood the patient information sheet dated 29.07.19 (version 3.0) for the HABIT study and have had the opportunity to consider the information ask questions and had these answered satisfactorily.                                                                                                                                                                                                                                                  |     |    |
| 2. I understand that my participation is voluntary and that I am free to withdraw at any time, without giving any reason, and without my medical care or legal rights being affected.                                                                                                                                                                                                                                                                                                 |     |    |
| 3. I understand that relevant sections of my medical notes and data collected during the study may be looked at by individuals from the University of Oxford, University of Manchester, University of Lincoln, regulatory authorities or from the NHS Trust, where it is relevant to my taking part in this research. This information will be transferred to the above named Universities and stored securely. I give permission for these individuals to have access to my records. |     |    |
| 4. I agree for members of the research team to access my medical notes for the purposes of data collection relevant to this study.                                                                                                                                                                                                                                                                                                                                                    |     |    |
| 5. Depending on the study group that I am assigned to, I agree for my sessions with the nurse to be digitally voice recorded. <i>(Optional)</i>                                                                                                                                                                                                                                                                                                                                       | Yes | No |
|                                                                                                                                                                                                                                                                                                                                                                                                                                                                                       |     |    |
| 6. I agree to take part in a more in depth discussion about my experiences of being part of the HABIT study and that this will be audio-recorded and sent to an external transcription company for transcribing and analysed by researchers. I understand that my anonymised quotations may be used in publications and training materials. <i>(This part of the study is optional)</i>                                                                                               | Yes | No |
|                                                                                                                                                                                                                                                                                                                                                                                                                                                                                       |     |    |
| 7. I agree to be contacted via email, post and phone by the research team only about the study.                                                                                                                                                                                                                                                                                                                                                                                       |     |    |
| 8. I would like to receive summary of the study findings at the end of the study. <i>(Optional)</i>                                                                                                                                                                                                                                                                                                                                                                                   | Yes | No |
|                                                                                                                                                                                                                                                                                                                                                                                                                                                                                       |     |    |
| 9. I agree to take part in the above study.                                                                                                                                                                                                                                                                                                                                                                                                                                           |     |    |

PRINT Participant name

Participant signature

Date

PRINT Researcher name

Researcher signature

Date

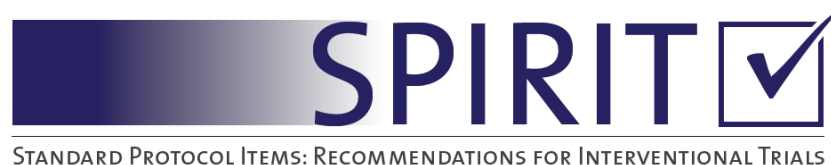

STANDARD PROTOCOL ITEMS: RECOMMENDATIONS FOR INTERVENTIONAL TRIALS

SPIRIT 2013 Checklist: Recommended items to address in a clinical trial protocol and related documents\*

| Section/item                      | Item No | Description                                                                                                                                                                                                                                                                              | Addressed on page number |
|-----------------------------------|---------|------------------------------------------------------------------------------------------------------------------------------------------------------------------------------------------------------------------------------------------------------------------------------------------|--------------------------|
| <b>Administrative information</b> |         |                                                                                                                                                                                                                                                                                          |                          |
| Title                             | 1       | Descriptive title identifying the study design, population, interventions, and, if applicable, trial acronym                                                                                                                                                                             | ___1___                  |
| Trial registration                | 2a      | Trial identifier and registry name. If not yet registered, name of intended registry                                                                                                                                                                                                     | ___3___                  |
|                                   | 2b      | All items from the World Health Organization Trial Registration Data Set                                                                                                                                                                                                                 | _____                    |
| Protocol version                  | 3       | Date and version identifier                                                                                                                                                                                                                                                              | _____                    |
| Funding                           | 4       | Sources and types of financial, material, and other support                                                                                                                                                                                                                              | ___19___                 |
| Roles and responsibilities        | 5a      | Names, affiliations, and roles of protocol contributors                                                                                                                                                                                                                                  | ___1,19___               |
|                                   | 5b      | Name and contact information for the trial sponsor                                                                                                                                                                                                                                       | _____                    |
|                                   | 5c      | Role of study sponsor and funders, if any, in study design; collection, management, analysis, and interpretation of data; writing of the report; and the decision to submit the report for publication, including whether they will have ultimate authority over any of these activities | ___19___                 |
|                                   | 5d      | Composition, roles, and responsibilities of the coordinating centre, steering committee, endpoint adjudication committee, data management team, and other individuals or groups overseeing the trial, if applicable (see Item 21a for data monitoring committee)                         | ___19___                 |

1 **Introduction**

2

3 Background and 6a Description of research question and justification for undertaking the trial, including summary of relevant \_\_\_4-6\_\_\_  
 4 rationale studies (published and unpublished) examining benefits and harms for each intervention  
 5

6 6b Explanation for choice of comparators \_\_\_5,9\_\_\_  
 7

8 Objectives 7 Specific objectives or hypotheses \_\_\_6-7\_\_\_  
 9

10 Trial design 8 Description of trial design including type of trial (eg, parallel group, crossover, factorial, single group),  
 11 allocation ratio, and framework (eg, superiority, equivalence, noninferiority, exploratory) \_\_\_7\_\_\_  
 12  
 13

14 **Methods: Participants, interventions, and outcomes**

15

16 Study setting 9 Description of study settings (eg, community clinic, academic hospital) and list of countries where data will \_\_\_7\_\_\_  
 17 be collected. Reference to where list of study sites can be obtained  
 18

19 Eligibility criteria 10 Inclusion and exclusion criteria for participants. If applicable, eligibility criteria for study centres and \_\_\_8\_\_\_  
 20 individuals who will perform the interventions (eg, surgeons, psychotherapists)  
 21

22 Interventions 11a Interventions for each group with sufficient detail to allow replication, including how and when they will be \_\_\_9-10,  
 23 administered supplementary  
 24 table 1\_  
 25  
 26 11b Criteria for discontinuing or modifying allocated interventions for a given trial participant (eg, drug dose \_\_\_supplementary  
 27 change in response to harms, participant request, or improving/worsening disease) table 1\_\_\_  
 28  
 29 11c Strategies to improve adherence to intervention protocols, and any procedures for monitoring adherence \_\_\_supplementary  
 30 (eg, drug tablet return, laboratory tests) table 1\_\_\_  
 31  
 32 11d Relevant concomitant care and interventions that are permitted or prohibited during the trial \_\_\_9\_\_\_  
 33

34 Outcomes 12 Primary, secondary, and other outcomes, including the specific measurement variable (eg, systolic blood \_\_\_11,14, Table  
 35 pressure), analysis metric (eg, change from baseline, final value, time to event), method of aggregation (eg, 1\_\_\_  
 36 median, proportion), and time point for each outcome. Explanation of the clinical relevance of chosen  
 37 efficacy and harm outcomes is strongly recommended  
 38  
 39  
 40  
 41  
 42

1 Participant timeline 13 Time schedule of enrolment, interventions (including any run-ins and washouts), assessments, and visits for \_\_\_\_10, Figure 1  
 2 participants. A schematic diagram is highly recommended (see Figure)  
 3  
 4 Sample size 14 Estimated number of participants needed to achieve study objectives and how it was determined, including \_\_\_\_13\_\_\_\_  
 5 clinical and statistical assumptions supporting any sample size calculations  
 6  
 7 Recruitment 15 Strategies for achieving adequate participant enrolment to reach target sample size \_\_\_\_7,8\_\_\_\_  
 8  
 9

10 **Methods: Assignment of interventions (for controlled trials)**

11 Allocation:

12  
 13 Sequence generation 16a Method of generating the allocation sequence (eg, computer-generated random numbers), and list of any \_\_\_\_10\_\_\_\_  
 14 factors for stratification. To reduce predictability of a random sequence, details of any planned restriction  
 15 (eg, blocking) should be provided in a separate document that is unavailable to those who enrol participants  
 16 or assign interventions  
 17  
 18 Allocation concealment mechanism 16b Mechanism of implementing the allocation sequence (eg, central telephone; sequentially numbered, \_\_\_\_10-11\_\_\_\_  
 19 opaque, sealed envelopes), describing any steps to conceal the sequence until interventions are assigned  
 20  
 21 Implementation 16c Who will generate the allocation sequence, who will enrol participants, and who will assign participants to \_\_\_\_10-11\_\_\_\_  
 22 interventions  
 23  
 24 Blinding (masking) 17a Who will be blinded after assignment to interventions (eg, trial participants, care providers, outcome \_\_\_\_11\_\_\_\_  
 25 assessors, data analysts), and how  
 26  
 27 17b If blinded, circumstances under which unblinding is permissible, and procedure for revealing a participant's \_\_\_\_  
 28 allocated intervention during the trial  
 29  
 30  
 31  
 32  
 33

34 **Methods: Data collection, management, and analysis**

35  
 36 Data collection methods 18a Plans for assessment and collection of outcome, baseline, and other trial data, including any related \_\_\_\_11\_\_\_\_  
 37 processes to promote data quality (eg, duplicate measurements, training of assessors) and a description of  
 38 study instruments (eg, questionnaires, laboratory tests) along with their reliability and validity, if known.  
 39 Reference to where data collection forms can be found, if not in the protocol  
 40  
 41  
 42



|    |                                 |     |                                                                                                                                                                                                                                                                                                                                       |               |
|----|---------------------------------|-----|---------------------------------------------------------------------------------------------------------------------------------------------------------------------------------------------------------------------------------------------------------------------------------------------------------------------------------------|---------------|
| 1  |                                 | 18b | Plans to promote participant retention and complete follow-up, including list of any outcome data to be collected for participants who discontinue or deviate from intervention protocols                                                                                                                                             | _____11_____  |
| 2  |                                 |     |                                                                                                                                                                                                                                                                                                                                       |               |
| 3  |                                 |     |                                                                                                                                                                                                                                                                                                                                       |               |
| 4  | Data management                 | 19  | Plans for data entry, coding, security, and storage, including any related processes to promote data quality (eg, double data entry; range checks for data values). Reference to where details of data management procedures can be found, if not in the protocol                                                                     | _____         |
| 5  |                                 |     |                                                                                                                                                                                                                                                                                                                                       |               |
| 6  |                                 |     |                                                                                                                                                                                                                                                                                                                                       |               |
| 7  |                                 |     |                                                                                                                                                                                                                                                                                                                                       |               |
| 8  | Statistical methods             | 20a | Statistical methods for analysing primary and secondary outcomes. Reference to where other details of the statistical analysis plan can be found, if not in the protocol                                                                                                                                                              | ___15-17___   |
| 9  |                                 |     |                                                                                                                                                                                                                                                                                                                                       |               |
| 10 |                                 |     |                                                                                                                                                                                                                                                                                                                                       |               |
| 11 |                                 | 20b | Methods for any additional analyses (eg, subgroup and adjusted analyses)                                                                                                                                                                                                                                                              | _____18_____  |
| 12 |                                 |     |                                                                                                                                                                                                                                                                                                                                       |               |
| 13 |                                 | 20c | Definition of analysis population relating to protocol non-adherence (eg, as randomised analysis), and any statistical methods to handle missing data (eg, multiple imputation)                                                                                                                                                       | ___15-17___   |
| 14 |                                 |     |                                                                                                                                                                                                                                                                                                                                       |               |
| 15 |                                 |     |                                                                                                                                                                                                                                                                                                                                       |               |
| 16 |                                 |     |                                                                                                                                                                                                                                                                                                                                       |               |
| 17 | <b>Methods: Monitoring</b>      |     |                                                                                                                                                                                                                                                                                                                                       |               |
| 18 |                                 |     |                                                                                                                                                                                                                                                                                                                                       |               |
| 19 | Data monitoring                 | 21a | Composition of data monitoring committee (DMC); summary of its role and reporting structure; statement of whether it is independent from the sponsor and competing interests; and reference to where further details about its charter can be found, if not in the protocol. Alternatively, an explanation of why a DMC is not needed | _____7_____   |
| 20 |                                 |     |                                                                                                                                                                                                                                                                                                                                       |               |
| 21 |                                 |     |                                                                                                                                                                                                                                                                                                                                       |               |
| 22 |                                 | 21b | Description of any interim analyses and stopping guidelines, including who will have access to these interim results and make the final decision to terminate the trial                                                                                                                                                               | _____         |
| 23 |                                 |     |                                                                                                                                                                                                                                                                                                                                       |               |
| 24 |                                 |     |                                                                                                                                                                                                                                                                                                                                       |               |
| 25 |                                 |     |                                                                                                                                                                                                                                                                                                                                       |               |
| 26 |                                 |     |                                                                                                                                                                                                                                                                                                                                       |               |
| 27 |                                 |     |                                                                                                                                                                                                                                                                                                                                       |               |
| 28 | Harms                           | 22  | Plans for collecting, assessing, reporting, and managing solicited and spontaneously reported adverse events and other unintended effects of trial interventions or trial conduct                                                                                                                                                     | _____14-15___ |
| 29 |                                 |     |                                                                                                                                                                                                                                                                                                                                       |               |
| 30 |                                 |     |                                                                                                                                                                                                                                                                                                                                       |               |
| 31 | Auditing                        | 23  | Frequency and procedures for auditing trial conduct, if any, and whether the process will be independent from investigators and the sponsor                                                                                                                                                                                           | _____         |
| 32 |                                 |     |                                                                                                                                                                                                                                                                                                                                       |               |
| 33 |                                 |     |                                                                                                                                                                                                                                                                                                                                       |               |
| 34 |                                 |     |                                                                                                                                                                                                                                                                                                                                       |               |
| 35 | <b>Ethics and dissemination</b> |     |                                                                                                                                                                                                                                                                                                                                       |               |
| 36 |                                 |     |                                                                                                                                                                                                                                                                                                                                       |               |
| 37 | Research ethics approval        | 24  | Plans for seeking research ethics committee/institutional review board (REC/IRB) approval                                                                                                                                                                                                                                             | ___18_____    |
| 38 |                                 |     |                                                                                                                                                                                                                                                                                                                                       |               |
| 39 |                                 |     |                                                                                                                                                                                                                                                                                                                                       |               |
| 40 |                                 |     |                                                                                                                                                                                                                                                                                                                                       |               |
| 41 |                                 |     |                                                                                                                                                                                                                                                                                                                                       |               |
| 42 |                                 |     |                                                                                                                                                                                                                                                                                                                                       |               |
| 43 |                                 |     |                                                                                                                                                                                                                                                                                                                                       |               |
| 44 |                                 |     |                                                                                                                                                                                                                                                                                                                                       |               |
| 45 |                                 |     |                                                                                                                                                                                                                                                                                                                                       |               |
| 46 |                                 |     |                                                                                                                                                                                                                                                                                                                                       |               |

|    |                      |     |                                                                                                                 |                      |
|----|----------------------|-----|-----------------------------------------------------------------------------------------------------------------|----------------------|
| 1  | Protocol             | 25  | Plans for communicating important protocol modifications (eg, changes to eligibility criteria, outcomes,        | _____                |
| 2  | amendments           |     | analyses) to relevant parties (eg, investigators, REC/IRBs, trial participants, trial registries, journals,     |                      |
| 3  |                      |     | regulators)                                                                                                     |                      |
| 4  |                      |     |                                                                                                                 |                      |
| 5  | Consent or assent    | 26a | Who will obtain informed consent or assent from potential trial participants or authorised surrogates, and      | _____ 8 _____        |
| 6  |                      |     | how (see Item 32)                                                                                               |                      |
| 7  |                      |     |                                                                                                                 |                      |
| 8  |                      | 26b | Additional consent provisions for collection and use of participant data and biological specimens in ancillary  | _____                |
| 9  |                      |     | studies, if applicable                                                                                          |                      |
| 10 |                      |     |                                                                                                                 |                      |
| 11 | Confidentiality      | 27  | How personal information about potential and enrolled participants will be collected, shared, and maintained    | _____                |
| 12 |                      |     | in order to protect confidentiality before, during, and after the trial                                         |                      |
| 13 |                      |     |                                                                                                                 |                      |
| 14 |                      |     |                                                                                                                 |                      |
| 15 | Declaration of       | 28  | Financial and other competing interests for principal investigators for the overall trial and each study site   | _____ 19 _____       |
| 16 | interests            |     |                                                                                                                 |                      |
| 17 |                      |     |                                                                                                                 |                      |
| 18 | Access to data       | 29  | Statement of who will have access to the final trial dataset, and disclosure of contractual agreements that     | _____                |
| 19 |                      |     | limit such access for investigators                                                                             |                      |
| 20 |                      |     |                                                                                                                 |                      |
| 21 | Ancillary and post-  | 30  | Provisions, if any, for ancillary and post-trial care, and for compensation to those who suffer harm from trial | _____                |
| 22 | trial care           |     | participation                                                                                                   |                      |
| 23 |                      |     |                                                                                                                 |                      |
| 24 | Dissemination policy | 31a | Plans for investigators and sponsor to communicate trial results to participants, healthcare professionals,     | _____ 18 _____       |
| 25 |                      |     | the public, and other relevant groups (eg, via publication, reporting in results databases, or other data       |                      |
| 26 |                      |     | sharing arrangements), including any publication restrictions                                                   |                      |
| 27 |                      |     |                                                                                                                 |                      |
| 28 |                      |     |                                                                                                                 |                      |
| 29 |                      | 31b | Authorship eligibility guidelines and any intended use of professional writers                                  | _____                |
| 30 |                      |     |                                                                                                                 |                      |
| 31 |                      | 31c | Plans, if any, for granting public access to the full protocol, participant-level dataset, and statistical code | _____                |
| 32 |                      |     |                                                                                                                 |                      |
| 33 | <b>Appendices</b>    |     |                                                                                                                 |                      |
| 34 |                      |     |                                                                                                                 |                      |
| 35 | Informed consent     | 32  | Model consent form and other related documentation given to participants and authorised surrogates              | _____ Appended _____ |
| 36 | materials            |     |                                                                                                                 |                      |
| 37 |                      |     |                                                                                                                 |                      |
| 38 | Biological           | 33  | Plans for collection, laboratory evaluation, and storage of biological specimens for genetic or molecular       | _____                |
| 39 | specimens            |     | analysis in the current trial and for future use in ancillary studies, if applicable                            |                      |
| 40 |                      |     |                                                                                                                 |                      |
| 41 |                      |     |                                                                                                                 |                      |

1 \*It is strongly recommended that this checklist be read in conjunction with the SPIRIT 2013 Explanation & Elaboration for important clarification on the items.  
2 Amendments to the protocol should be tracked and dated. The SPIRIT checklist is copyrighted by the SPIRIT Group under the Creative Commons  
3 "[Attribution-NonCommercial-NoDerivs 3.0 Unported](#)" license.  
4  
5  
6  
7  
8  
9  
10  
11  
12  
13  
14  
15  
16  
17  
18  
19  
20  
21  
22  
23  
24  
25  
26  
27  
28  
29  
30  
31  
32  
33  
34  
35  
36  
37  
38  
39  
40  
41  
42  
43  
44  
45  
46

For peer review only
